1 **Fine-grained habitat-associated genetic connectivity in an**  
2 **admixed population of mussels in the small isolated**  
3 **Kerguelen island**

4 Christelle Fraïsse<sup>1,2,\*</sup>, Anne Haguenaer<sup>3</sup>, Karin Gérard<sup>4</sup>, Alexandra Anh-Thu Weber<sup>3,5</sup>,

5 Nicolas Bierne<sup>1</sup> and Anne Chenuil<sup>3</sup>

6 <sup>1</sup> Institut des Sciences de l'Evolution UMR5554, Université Montpellier, CNRS, IRD, EPHE,  
7 34095 Montpellier cedex 05, France.

8 <sup>2</sup> Institute of Science and Technology Austria, Am Campus 1, 3400 Klosterneuburg, Austria.

9 <sup>3</sup> Institut Méditerranéen de Biodiversité et d'Ecologie marine et continentale - CNRS UMR  
10 7263, Aix-Marseille Université, Station marine d'Endoume, 13007 Marseille, France.

11 <sup>4</sup> Laboratorio de Ecosistemas Marinos Antárticos y Subantárticos, Instituto de la Patagonia,  
12 Universidad de Magallanes, Avenida Bulnes #01890, Punta Arenas, Chile.

13 <sup>5</sup> Zoological Institute, University of Basel, Vesalgasse 1, 4051 Basel, Switzerland.

14 \* *Corresponding author: E-mail: christelle.fraisse@ist.ac.at.*

15 Running title: Admixture and genetic-environment association in a small island

16 Keywords: *Mytilus* mussels, Adaptation, Native / non indigenous species, Admixture,  
17 Introgression, Genetic - environment association.

## 18 **Abstract**

19 Reticulated evolution -i.e. secondary introgression / admixture between sister taxa- is  
20 increasingly recognized as a key evolutionary process that may play a role in structuring  
21 infra-specific genetic variation, and possibly promoting adaptation. *Mytilus spp.* is an ideal  
22 system to assess its importance, because these marine mussels form semi-isolated species that  
23 remain reproductively compatible over large time-scales. It includes three taxa that hybridize  
24 in the Northern Hemisphere (*M. edulis*, *M. galloprovincialis* and *M. trossulus*) and two taxa of  
25 uncertain ancestry in the Southern Hemisphere (*M. platensis*: South America and the  
26 Kerguelen Islands; and *M. planulatus*: Australasia). The Kerguelen mussels are of particular  
27 interest to investigate the potential role of admixture in enhancing micro-geographic structure,  
28 as they inhabit a small and isolated island in the Southern Ocean characterized by a highly  
29 heterogeneous environment, and genomic reticulation between Northern and Southern  
30 lineages has been suspected. Here, we extended a previous analysis by using targeted-  
31 sequencing data (51,878 SNPs) across the three Northern species and the Kerguelen  
32 population, coupled with a panel of 33 SNPs genotyped on 695 mussels across 35 sites in the  
33 Kerguelen Islands. The panel was enriched with ancestry-informative SNPs, i.e. SNPs that  
34 were more differentiated than the genomic average between Northern lineages, to evaluate  
35 whether reticulated evolution contributed to micro-geographic structure. We first showed that  
36 the Kerguelen population belongs to a divergent Southern lineage, most related to *M. edulis*  
37 mussels, that experienced secondary admixture with non-indigenous Northern species. We  
38 then demonstrated that the Kerguelen mussels were significantly differentiated over small  
39 spatial distance, and that this local genetic structure was associated with environmental  
40 variation and mostly revealed by ancestry-informative markers. Although local adaptation can  
41 explain the association with the environment we believe it more likely that environment  
42 variables better describe population connectivity than geographic distance. Our study

- 43 highlights genetic connectivity of populations is more easily revealed by non-equilibrium  
44 secondary introgression clines at a subset of loci, while association with the environment  
45 should not be hastily advocated to support adaptation from admixture variation.

## 46 **Introduction**

47 Genetic divergence at a fine-grained spatial scale is an interesting situation in which neutral  
48 processes can more easily be disentangled from adaptive ones. Yet, micro-geographic  
49 adaptation is expected to be rare because theory shows that local adaptation is limited by gene  
50 flow when the scale of dispersal is large relative to habitat patch size (Lenormand 2002).  
51 Marine species with planktonic larvae are high-dispersal organisms, with large effective  
52 population size and living in a highly connected environment (Cowen & Sponaugle 2009),  
53 thereby they generally show low level of genetic differentiation across the species range  
54 (Palumbi 1992). Nevertheless, there is some evidence that micro-geographic genetic-  
55 environment associations occur at specific loci in marine species, such as barnacles (Schmidt  
56 & Rand 1999), mussels (Koehn *et al.* 1980) or Atlantic killifishes (Reid *et al.* 2017), despite  
57 genome-wide genetic homogeneity. These are expected in geographic regions where  
58 environmental gradients promote local adaptation (Schmidt *et al.* 2008), or where semi-  
59 permeable genetic backgrounds form a contact zone that couples with environmental variation  
60 (Bierne *et al.* 2011).

61 Understanding how these local genetic patterns can be produced by a complex history of  
62 reticulated evolution is crucial to uncover the origins of genetic variation (i.e., new mutations,  
63 standing variation, or gene-flow), and especially adaptive variation (Welch & Jiggins 2014;  
64 Lee & Coop 2017). Actually, introgression is increasingly acknowledged as an important  
65 source of adaptation with many examples collected in plants (Arnold 2004) and animals  
66 (Hedrick 2013). Adaptation from hybridizing sister species (or conspecific semi-isolated  
67 populations) has been argued to be potentially faster than from new mutations because: (i)  
68 incoming beneficial alleles usually start at higher frequencies, (ii) multiple changes within a  
69 gene or across multiple loci can be introgressed at once and (iii) adaptive variants coming  
70 from a sister-species are generally older than new mutations, so they may have already been

71 tested by selection in the past. Indeed, in the context of an invading lineage experiencing new  
72 environmental conditions already faced by the native lineage, introgression of adaptive alleles  
73 seems a likely outcome (Wang *et al.* 2014). In addition, introgression creates a departure from  
74 equilibrium situations in which the influx of heterospecific alleles from one genetic  
75 background generates a transient gradient in allele frequencies within the other genetic  
76 background, revealing cryptic connectivity patterns (Gagnaire *et al.* 2015). Importantly, the  
77 reduction in gene flow between the backgrounds is expected to be visible only on a subset of  
78 markers localised at an intermediate linkage map distance to reproductive isolation genes.  
79 This potential effect of introgression on our capacity to detect connectivity breaks in  
80 apparently well-mixed populations is of central concern to conservation and species  
81 management (Gagnaire *et al.* 2015). In addition, because secondary contact zones often  
82 coincide with environmental transitions (Bierne *et al.* 2011), gradient of introgression may  
83 easily be confounded with local adaptation signatures, especially when environmental  
84 variables better describe the pattern of connectivity than geographic distance.

85 *Mytilus* mussels are an excellent system to address these issues, because they are subdivided  
86 into partially reproductively isolated species. Moreover, a recent study based on  $F_{ST}$  genome  
87 scans and small-scale gene genealogies demonstrated that local introgression is widespread,  
88 and it is the primary cause of outlying levels of genetic differentiation between conspecific  
89 populations (Fraïsse *et al.* 2016). *Mytilus* mussels have an antitropical distribution, i.e. they  
90 occur in high latitudes of the Northern and Southern Hemispheres, as a result of  
91 transequatorial migration during the Pleistocene (Hilbish *et al.* 2000; Gérard *et al.* 2008). In  
92 the North, *M. edulis* and *M. galloprovincialis* are closely-related species which started to  
93 diverge about 2.5 mya (Roux *et al.* 2014), while *M. trossulus* is clearly an outgroup to them  
94 with a divergence dated at 3.5 mya (Rawson & Hilbish 1995). The three species have  
95 experienced a complex history of divergence punctuated by periods of gene flow (Roux *et al.*

96 2014); and nowadays they display hybrid zones where their ranges overlap (Skibinski *et al.*  
97 1983; Väinölä & Hvilson 1991; Bierne *et al.* 2003). In the South, a reevaluation of allozyme  
98 data and a review of the results obtained with mtDNA and two nuclear DNA markers (Borsa  
99 *et al.* 2012) encouraged to group Southern mussels in two different taxa, namely *M. platensis*  
100 for those related to *M. edulis* (the South American and Kerguelen mussels), and *M. planulatus*  
101 for those related to *M. galloprovincialis* (the Australasian mussels). The presence of a  
102 mitochondrial clade endemic to the Southern Ocean further suggests Southern mussels are  
103 native rather than introduced by human-mediated activities (Hilbish *et al.* 2000; Gaitán-  
104 Espitia *et al.* 2016). So far, two alternative scenarios of transequatorial migration have been  
105 proposed to explain their origin (Gérard *et al.* 2008): (i) two independent migration events,  
106 one from an ancestral lineage that gave rise to *M. edulis* in the North and *M. platensis* in the  
107 South, and one from an ancestral lineage that produced *M. galloprovincialis* in the North and  
108 *M. planulatus* after migrating to the South, followed by mitochondrial swamping in Northern  
109 populations; or (ii) a single migration event older than the divergence between *M. edulis* and  
110 *M. galloprovincialis* followed by geographical differentiation between *M. platensis* and *M.*  
111 *planulatus* with incomplete lineage sorting at nuclear genes.

112 In the Southern Indian ocean, the isolated Kerguelen Islands harbor *Mytilus* mussels which  
113 are polymorphic for allozyme alleles characteristic of all three Northern species (Blot *et al.*  
114 1988), although they are most similar to *M. edulis* at a few allozyme loci (McDonald *et al.*  
115 1991). Further analyses with nuclear markers strengthened the view of a mixed genome  
116 ancestry of the Kerguelen mussels (Borsa *et al.* 2007): at Glu-5', a Northern diagnostic  
117 marker, mussels carry a heterospecific polymorphism (*M. edulis* / *M. galloprovincialis*).  
118 Surprisingly, and as opposed to admixed mussels in the Northern hybrid zones (Bierne *et al.*  
119 2003), this polymorphism is not in linkage disequilibrium with the Northern genetic  
120 backgrounds, although genetic differentiation is maintained between micro-habitats (Gérard

121 *et al.* 2015). This micro-geographical variation in allele frequency suggests that admixture  
122 with Northern mussels contributed to the pattern observed at Glu-5', although shared ancestry  
123 certainly affects a large part of the genome in these closely-related species. These preliminary  
124 results suggest either that reproductive isolation genes responsible of the interspecific barrier  
125 in the North were not yet evolved at the time of admixture (if any) in the Kerguelen, or that  
126 isolation is not as strong in the demographic, ecological and genetic context of the Kerguelen  
127 Islands as it is in the Northern Hemisphere hybrid zones. Accordingly, reproductive isolation  
128 genes have not been reported so far between mussels in the Kerguelen Islands.

129 The geomorphology of the Kerguelen Islands has been shaped by volcanic activity and  
130 glacial erosion which resulted in a carved coast with sheltered bays and fjords (Gérard *et al.*  
131 2015). Micro-geographic adaptation in the islands has first been evoked by Blot *et al.* (1989)  
132 who reported genetic differences between populations at three allozymes (Lap, Pgm, Pgd)  
133 whose frequencies correlated with salinity and wave exposure. Recently, Gérard *et al.* (2015)  
134 have investigated the genetic-environment associations in the island with four nuclear markers  
135 (mac-1, Glu-5', EFbis and EFprem's) and a mitochondrial gene (COI). Only Glu-5' revealed  
136 significant genetic differentiation among and within geographic regions, and between habitats.  
137 In particular, allele frequencies at Glu-5' were significantly correlated with the  
138 presence/absence of the kelp *Macrocystis* in the island, which serves as substrata and refuge  
139 for many molluscs species. As such, local adaptation was invoked to explain the fine-scale  
140 maintenance of polymorphism at Glu-5'. Because Glu-5' and candidate allozymes are  
141 strongly differentiated between Northern species (Skibinski *et al.* 1983, Rawson *et al.* 1996),  
142 we might suspect that adaptation in Kerguelen populations may have been facilitated by gene  
143 exchange with Northern Hemisphere lineages. However, we do not usually expect adaptive  
144 polymorphisms to be found easily with few markers (Hoban *et al.* 2016) and the ease with  
145 which this micro-geographic signal of differentiation has been identified calls for more

146 complex interpretations (Bierne *et al.* 2011, Gagnaire *et al.* 2015).

147 Here, we investigated whether reticulate evolution actually contributed to micro-geographic  
148 structure in the Kerguelen islands, and if so, whether (i) admixture facilitated local adaptation  
149 in the island, or (ii) eased our investigation of the connectivity patterns thanks to the detection  
150 of two genetic backgrounds that coexist in the island and introgress. We used published  
151 genotyping-by-sequencing (GBS) data of the three Northern species (Fraïsse *et al.* 2016) and  
152 new GBS data of a sample from a single Kerguelen population to reconstruct their genetic  
153 relationships, and investigate whether reticulated patterns found with a handful of markers  
154 hold genome-wide. Past introgression events between Northern and Southern mussels were  
155 robustly inferred (on top of high rates of incomplete lineage sorting) by testing for admixture  
156 with genome-wide allele frequency data and reconstructing gene genealogies at a small  
157 chromosomal scale. In addition, a new SNP dataset from thirty-five Kerguelen populations  
158 was produced by genotyping mussels with a KASpar (kompetitive allele specific PCR) SNP  
159 assay, which was enriched for ancestry-informative loci (i.e., loci that are more differentiated  
160 than the genomic average between reference samples in the Northern Hemisphere). These  
161 ancestry-informative loci enabled us to infer genetic structure at a micro-geographical scale in  
162 the islands and connect the evolution of the Kerguelen mussels with the history of the *Mytilus*  
163 species in the Northern Hemisphere. We found that the Kerguelen Islands harbor a divergent  
164 Southern lineage of mussels that we propose to consider as the native lineage, which is more  
165 related to *M. edulis*, and was subsequently admixed with non-indigenous Northern species.  
166 We then confirmed a significant fine-scale genetic differentiation between sites associated  
167 with environmental variables. Notably, we found that loci with a more pronounced genetic-  
168 environment association (GEA) also tended to be among the most ancestry-informative  
169 markers in the *Mytilus spp.* We discuss the importance of introgression from past admixture  
170 events with Northern lineages and its role on the current and local genetic structure of the



171 Kerguelen mussels.

## 172 **Materials and Methods**

### 173 **Genotyping-by-sequencing of the *Mytilus* spp.**

174 We used samples collected from eleven localities in the Northern Hemisphere (Supp. Info.  
175 M&M and Table S1) to investigate the patterns of admixture between Northern and Southern  
176 genetic backgrounds in the Kerguelen Islands. The genetic composition of these samples has  
177 been analysed in Fraïsse *et al.* (2016) with target enrichment sequencing of bacterial artificial  
178 chromosomes (BAC) and cDNA sequences (see Supp. Info. M&M for details). The Northern  
179 samples have been shown to be representative of populations of the *Mytilus edulis* species  
180 complex, which comprises three species that hybridize at several places in the Northern  
181 Hemisphere: *M. galloprovincialis*, *M. edulis* and *M. trossulus*. In addition to these previously  
182 published samples, eight individuals from the Kerguelen Islands (Baie de la Mouche, Table  
183 S1) were included in the target enrichment experiment. These individuals were treated  
184 together with the Northern samples following the genotyping-by-sequencing (GBS) method  
185 described in Fraïsse *et al.* (2016) (see Supp. Info. M&M for details). The final dataset across  
186 the twelve localities consisted of 1269 reference sequences (378 BAC contigs that come from  
187 a pool of 224 unlinked clones, and 891 cDNA contigs that correspond to unlinked coding  
188 sequences of known-functions or randomly selected) and 129,346 SNPs. DNA sequences and  
189 VCF files including GBS genotypes are available on Dryad doi: 10.5061/dryad.6k740 (Fraïsse  
190 *et al.* 2016).

### 191 **KASPar SNP panel**

192 Based on the SNP database generated by GBS, we specifically selected SNPs segregating in  
193 the eight GBS-typed Kerguelen individuals to analyse the fine-scale genetic structure in the

194 island, and its relation to the local environment. Moreover, as we wanted to determine if  
195 adaptation in the Kerguelen was primarily driven by standing variation in the Northern  
196 complex of species (i.e. SNPs fixed between Northern species), the selected SNPs were not a  
197 random sample of the SNPs detected by GBS, otherwise they would have been mainly private  
198 polymorphisms to the Kerguelen (60% of the Kerguelen SNPs were found private). As such,  
199 we further enriched our SNP array with ancestry-informative markers, the most differentiated  
200 SNPs between pairs of Northern Hemisphere species (representing 33% of the non-private  
201 Kerguelen SNPs, 10% of the whole SNP dataset), namely the West-Mediterranean *M.*  
202 *galloprovincialis* population, the North-Sea *M. edulis* population and the Baltic-Sea *M.*  
203 *trossulus* population.  $F_{ST}$  values (Weir & Cockerham 1984) were calculated using the R  
204 package hierfstat (Goudet 2005) for each SNP between pairs of populations (Text S1). SNPs  
205 in the upper 15% of the empirical  $F_{ST}$  distribution were categorized as highly-differentiated.  
206 Any SNPs with more than 25% of missing data were discarded. Retained SNPs were further  
207 filtered-out based on Illumina Assay Design Tool scores (available on Illumina web page,  
208 <http://support.illumina.com>) which predicts probes success based on the number of  
209 degenerated sites in the flanking sequences (250 bp on each side of the focal SNP). The final  
210 array comprised 58 SNPs out of which 30 were highly differentiated between Northern  
211 species (11 *M. trossulus*-specific, 8 *M. edulis*-specific and 10 *M. galloprovincialis*-specific,  
212 Table S2).

### 213 **KASPar genotyping in the Kerguelen Islands**

214 We used samples collected from 35 sites in the Kerguelen Islands by Gérard *et al.* (2015),  
215 totalling 695 individuals (Supp. Info. M&M and Table S3). Pieces of mantle tissue were  
216 preserved in 95% ethanol, and DNA was extracted with the Macherey-Nagel NucleoSPin 96  
217 Tissue kit. A KASPar (Kompetitive Allele Specific PCR) genotyping assay (Smith &

218 Maughan 2015) was used to genotype the 58 SNPs, of them, 44 SNPs were successfully  
219 amplified. We removed seven loci which showed significant  $F_{ST}$  values between the eight  
220 GBS-typed Kerguelen individuals and the KASPar individuals. These may be due to error in  
221 the genotyping-by-sequencing, typically the assembly of paralogous loci in two alleles of the  
222 same locus, or alternatively to problem of amplification in the KASPar assay as a  
223 consequence of primer design. We further eliminated two loci with null alleles (significant  $F_{IS}$   
224 values in most of the sampling sites) and two loci physically linked to one another. The final  
225 dataset was composed of 33 KASPar SNPs (Table S2). Additionally, we included allele  
226 frequency data of a length-polymorphism locus in the adhesive plaque protein gene, Glu-5',  
227 previously scored in the same sampling sites (Gérard *et al.* 2015). Genotypes for all  
228 individuals at each KASPar SNP is available in Text S2, and population allele frequencies are  
229 given in Table S4.

### 230 **Genetic network of the *Mytilus* spp.**

231 Genotypes of the GBS dataset were statistically phased with beagle v3.3.2 (Browning &  
232 Browning 2007) using genotype likelihoods provided by bcftools. All individuals were  
233 included in the analysis to maximize linkage disequilibrium, and 20 haplotype pairs were  
234 sampled for each individual during each iteration of the phasing algorithm to increase  
235 accuracy. Phased sequences (haplotypes) were then generated using a custom perl script. An  
236 individual genetic network analysis was conducted with splitstree4 v4.12.6 (Hudson &  
237 Bryant 2006) to get insight into the population relationships across the three Northern  
238 Hemisphere species and the eight individuals sampled in the Kerguelen Islands. All haplotype  
239 loci were compiled to create an artificial chromosome of 51,878 high-quality SNPs and  
240 analysed using the neighbour-net method.

241 **Analyses of admixture in the *Mytilus* spp.**

242 An estimation of the historical relationships among the eleven Northern populations and the  
243 GBS-typed Kerguelen population was performed with *TreeMix* v.1.1 (Pickrell & Pritchard  
244 2012). A maximum-likelihood population tree was estimated based on the matrix of GBS  
245 allele frequency covariance between population pairs, and admixture events were sequentially  
246 added. To account for linkage disequilibrium, variants were grouped together in windows of  
247 size  $k=100$  SNPs. Trees were rooted with the two *M. trossulus* populations and no sample size  
248 correction (option “-noss”) was applied. We tested for a range of migration events from  $m=0$   
249 to  $m=12$ , and looked for an asymptotic value of the log-likelihood. The number of significant  
250 migration events was assessed by stepwise comparison of Akaike information criterion (AIC)  
251 values. Finally, we made 100 bootstrap replicates (option “-bootstrap”) of the maximum-  
252 likelihood tree to assess statistical support of migration edges.

253 Additionally, we performed model-based clustering analysis of these populations based on  
254 the GBS genotypes. Ancestry of each individual was estimated using the Maximum-  
255 likelihood approach implemented in ADMIXTURE v1.23 (Alexander *et al.* 2009). We ran 50  
256 replicates for a number of clusters from  $K=2$  to  $K=8$  and chose the maximum log-likelihood  
257 run for each  $K$ . We also performed a supervised clustering analysis on the Kerguelen  
258 individuals with the KASPar SNPs ( $K=2$  clusters and 50 replicates). We defined *M. edulis* and  
259 the Chilean mussels as reference populations from which the Kerguelen individuals derive  
260 their ancestry. Individual ancestries are provided in Text S3 for the GBS analysis and Text S4  
261 for the KASPar analysis.

262 In complement to the *TreeMix* analysis, we used a model-based approach implemented in  
263 *∂a∂i* v1.6.3 (Gutenkunst *et al.* 2009) to explicitly test for the presence of gene flow between  
264 Kerguelen mussels and Northern species during their divergence history. It was assessed in a  
265 pairwise manner based on their folded joint site frequency spectrum at the cDNA contigs

266 (provided in Text S5 in  $\partial a \partial i$  format, and plotted in Figure S1): Kerguelen vs. *M. edulis*  
267 (represented by the european sample “EU – external”); Kerguelen vs. *M. galloprovincialis*  
268 (mediterranean sample “MED – west”); Kerguelen vs. *M. trossulus* (european sample “EU”).  
269 We defined eight demographic models following previous studies (Tine *et al.* 2014; Christe *et*  
270 *al.* 2017) to test: (i) the timing of gene flow during divergence (absence of gene flow “SI”,  
271 continuous migration “IM”, secondary contact “SC”, ancient migration “AM”); (ii) the  
272 genomic heterogeneity in gene flow (presence “2M” or absence of interspecific genomic  
273 barriers); (iii) the genomic heterogeneity in effective population size (presence “2N” or  
274 absence of Hill-Robertson effects). All models began with the split of the ancestral population  
275 in two daughter populations, and then were followed by divergence in the absence or presence  
276 of gene flow. Each model was fitted to the observed joint site frequency spectrum (singletons  
277 were masked) using three successive optimization steps: “hot” simulated annealing, “cold”  
278 simulated annealing and BFGS (Tine *et al.* 2014). Model comparisons were made using AIC.  
279 A summary of the models is given in Table S5 and the script that defines the models in  $\partial a \partial i$  is  
280 given in Text S6.

### 281 **Topology weighting of the *Mytilus* spp.**

282 The distinct haplotype loci of the GBS dataset were also individually analysed with the  
283 neighbour-net method. Allele genealogies were inferred with the R package APE (Paradis  
284 2010) using a neighbour-joining algorithm with F84 distances (Felsenstein & Churchill 1996).  
285 Haplotype loci were filtered based on the following excluding criteria: scale < 0.00005 ;  
286 0.00005 =< scale < 0.0005 & length < 10000 bp ; 0.0005 =< scale < 0.001 & length < 5000  
287 bp ; and scale >= 0.001 & length >= 1000 bp, where “scale” is the scale of the gene tree and  
288 “length” is the length of the sequence. Neighbour-joining trees of the 395 retained sequences  
289 are available in Text S7 and their length are indicated in Table S6 (4.5 kb in average, a

290 minimum length of 1 kb and a maximum length of 25 kb).

291 For each haplotype locus, the relationships between the Northern species and the Kerguelen  
292 population were then quantified using *Twisst* (Van Belleghem *et al.* 2017), a tree weighting  
293 approach. We tested the three possible unrooted topologies: (A) *M. edulis* grouped with the  
294 Kerguelen population; (B) *M. galloprovincialis* grouped with the Kerguelen population and  
295 (C) *M. trossulus* grouped with the Kerguelen population. Their exact weightings to the full  
296 tree were estimated by considering all subtrees (“complete method”). Only contigs with a  
297 resolved topology were analysed: 67 contigs for which one topology had a weight greater or  
298 equal to 0.75. These topologies were further classified in two categories depending on  
299 whether they most plausibly reflect: (i) ancient divergence of the Kerguelen population (i.e.  
300 the Kerguelen and Northern individuals clustered into distinct monophyletic groups) or, (ii)  
301 introgression with one of the Northern species (i.e., the Kerguelen individuals were  
302 distributed within one or more Northern clades); "na" stands for topologies that we were  
303 unable to classify in these two categories due to a lack of informative sites. Tree topology  
304 weightings and classification are available in Table S6.

### 305 **Analyses of genetic variation in the Kerguelen Islands**

306 For each KASPar SNP, estimation of  $F_{ST}$  values (Weir & Clark Cockerham 1984) was  
307 calculated over all sampling sites (Table S2), and in a pairwise manner across all SNPs (Table  
308 S76) using Genetix 4.05 (Belkhir *et al.* 2002). Their significance was tested by a permutation  
309 procedure (1000 permutations) and adjusted with the Bonferroni’s correction for multiple  
310 comparisons (Benjamini & Hochberg 2000).

### 311 **Analysis of habitat variables in the Kerguelen Islands**

312 To evaluate how much of the genetic variation among sites was explained by local

313 environmental factors, we used redundancy analysis (RDA), a constrained ordination method  
314 implemented in the R package *vegan* (Oksanen *et al.* 2017). It performs a multiple linear  
315 regression between a matrix of response variables (individual genotypic data) and a matrix of  
316 explanatory variables (environmental factors). Notably, the effect of partially confounded  
317 explanatory variables can be estimated separately. RDA is commonly used to estimate the  
318 relative contribution of spatial and environmental components on species communities, and it  
319 has been recently applied to analysis of population genetic structure (e.g., Legendre & Fortin  
320 2010). Geographic coordinates and five qualitative factors were measured in each site to  
321 describe the local habitat (Table S3): (i) Substrate (rock: R, blocks: B, gravels: G, or sand: S);  
322 (ii) Wave Exposure (sheltered: Sh, or exposed: E); (iii) Slope (flat: F, steep: St, or hangover:  
323 H); (iv) Salinity (oceanic water: OW, or low-salinity water: LSW); (v) *Macrocystis* (presence:  
324 P, or absence: A).

325 We specifically tested the effect of each of these constrained factors (explanatory variables)  
326 on the distribution of genotypes at the 33 KASPar SNPs (response variables). The following  
327 initial model was used: Genotypes ~ *Macrocystis* + Salinity + Slope + Exposure + Substrate +  
328 Longitude + Latitude. The significance of the global model was first established by  
329 permutation test, in which the genotypic data were permuted randomly and the model was  
330 refitted (1000 permutations). Marginal effect permutation tests were then performed to assess  
331 the significance of each factor by removing each term one by one from the model containing  
332 all other terms (1000 permutations). Nonsignificant factors were removed from the final  
333 model. Based on that model, we performed a conditioned RDA analysis for each factor to  
334 assess its contribution to the genotypic variance independently from the other explanatory  
335 variables. These co-variables were removed from the ordination by using a condition  
336 function: Genotypes ~ tested variable + condition(all other variables). Finally, we performed a  
337 conditioned RDA on geography to specifically control its confounding effect: Genotypes ~

338 significant environmental variables + condition(significant geographic variables).

### 339 **Simulations of secondary contact**

340 Following the methodology of Gagnaire *et al.* 2015, we modelled a secondary contact  
341 between two semi-isolated genetic background (*M. edulis* vs. *M. platensis* Chilean  
342 population) that meet twice on a circular stepping stone model (between demes n°18 / n°19  
343 and demes n°19 / n°20), and start to exchange genes. At generation zero, the *M. edulis*  
344 background settles in deme n°19 while the *M. platensis* background is located everywhere  
345 else. Their initial allele frequency at the barrier loci was set-up to 0.10 for the *M. edulis*  
346 background and 0.70 for the *M. platensis* background, which correspond to the average  
347 foreign allele frequency at the four more differentiated loci observed in the *M. edulis* and  
348 Chilean *M. platensis* mussels, respectively (see Figure 4B). The auto-recruitment rate was set  
349 to  $1-m$ , and migration to adjacent demes was  $m/2$  (with  $m=0.5$ ). A barrier to dispersal was set  
350 between demes n°18 and n°19 ( $m=0.05$ ), which corresponds to the genetic break observed  
351 between sites PAF and RdA in the Kerguelen Islands. Strong and asymmetric selection ( $s=0.5$   
352 against the *M. platensis* allele in the *M. edulis* background vs.  $s=0.2$  against the *M. edulis*  
353 allele in the *M. platensis* background) acts on bi-locus haploid genotypes at a barrier locus,  
354 which is linked to a neutral marker located 1cM away and unlinked to a second neutral  
355 marker. Deme size was constant and set to 500 individuals.

### 356 **Results**

#### 357 **The Kerguelen mussels: signal of divergence of a Southern lineage after transoceanic** 358 **migration and secondary admixture with Northern lineages**

359 An individual genetic network (Figure 1) was built from a subset of 51,878 high-quality SNPs  
360 genotyped in eleven Northern populations and eight individuals from the Kerguelen Islands.



361 We observed that the Northern populations formed three distinct clusters, corresponding to the  
362 three Northern species: *M. edulis*, *M. galloprovincialis* and *M. trossulus*. Accordingly, the  
363 majority of SNPs fixed between populations (295 in total) were species-specific: *M. edulis*=6,  
364 *M. galloprovincialis*=62 and *M. trossulus*=224. The Kerguelen individuals clustered together  
365 into a single divergent clade. Indeed, the proportion of SNPs which were private to the  
366 Kerguelen Islands amounted to 60% (3805 private for a total of 6297 SNPs in Kerguelen,  
367 after removing singletons). In comparison, the number of private SNPs in *M. trossulus* was  
368 3070, and it was only 492 in *M. galloprovincialis* and 48 in *M. edulis* (indicative of  
369 introgression between the two latter species). Among the 2492 SNPs shared by the Kerguelen  
370 mussels with Northern species, 33% (830) were highly differentiated between at least two  
371 Northern species. When considering Northern species-specific SNPs, 83% of those fixed in  
372 *M. edulis* were segregating in the Kerguelen (5 for a total of 6 fixed). These numbers were  
373 16% for *M. galloprovincialis* (10 for a total of 62 fixed) and 12% in *M. trossulus* (27 for a  
374 total of 224 fixed). A multivariate analysis on KASpar-typed SNPs, including the Northern  
375 samples, the Kerguelen Islands and other samples from the Southern Hemisphere that were  
376 also genotyped in our SNP assay, is provided as a supplementary figure (Figure S2). The  
377 principal component analysis clearly shows that the Chilean mussels (MAU) group with the  
378 Kerguelen mussels in accordance with them being both named *M. platensis*; while the  
379 Australasian samples (Australia, Tasmania and New-Zealand) usually named *M. planulatus*  
380 cluster with the Northern *M. galloprovincialis*. These findings corroborate previous results  
381 based on mitochondrial DNA (Gérard *et al.* 2008) and nuclear markers (Borsa *et al.* 2012).

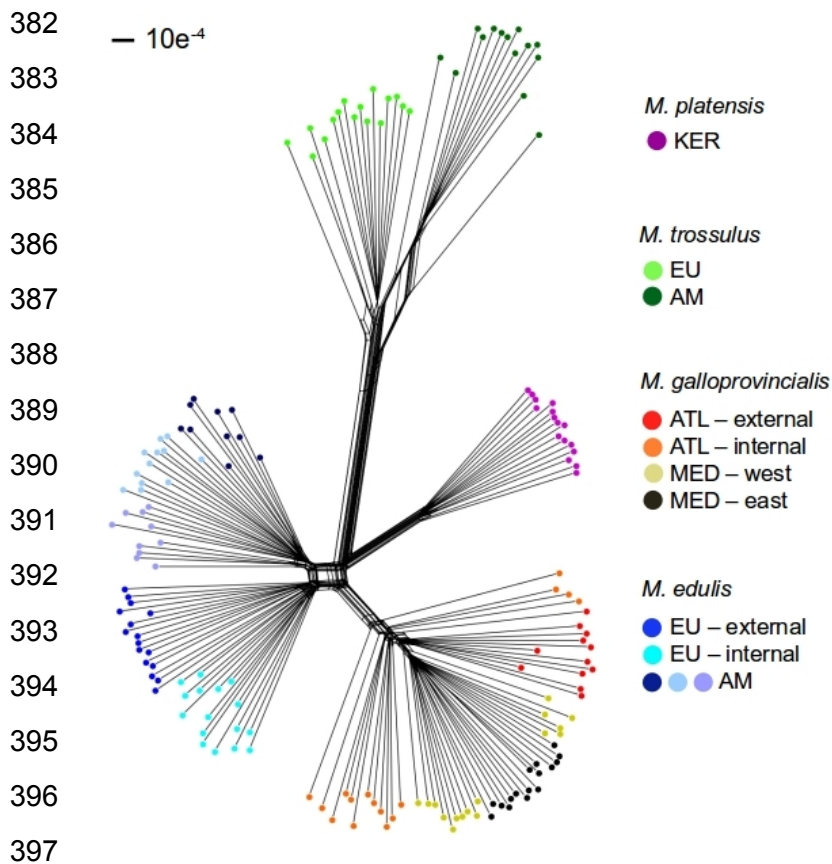

**Figure 1.** Genetic network of the Northern- and Southern-Hemisphere *Mytilus* spp. (twelve GBS-typed populations) produced with the neighbour-net method based on 51,878 high-quality GBS SNPs. The *M. platensis* sample is ‘Baie de la Mouche’ (KER, purple) in the Kerguelen Islands (Southern Ocean). *M. trossulus* samples are ‘Tvarminne’ (EU, light green) in the European population of the Baltic Sea and ‘Tadoussac’ (AM, dark green) in the American population of the Saint Lawrence River. *M.*

*galloprovincialis* samples are ‘Faro’ (ATL – external, red) in the Atlantic population of Iberian Coast, ‘Guillec’ (ATL – internal, orange) in the Atlantic population of Brittany, ‘Sete’ (MED – west, yellow) in the Occidental Mediterranean basin and ‘Crete’ (MED – east, black) in the Oriental Mediterranean basin. *M. edulis* samples are ‘Wadden Sea’ (EU – external, light blue) in the European population of the North Sea, ‘Lupin/Fouras’ (EU – internal, cyan) in the European population of the Bay of Biscay and ‘Quonochontaug/Old Saybrook Town’ (AM, three localities: dark blue, sky blue, slate blue) in the American population of Rhode Island.

The species relationships found in the genetic network (Figure 1) were generally supported by the maximum-likelihood population tree inferred by *TreeMix* (Figure 2), except that the Kerguelen population was inferred as the sister-group of *M. edulis*. The pairwise population residuals in a model without admixture (Figure S3) suggested substantial migration between species. So, we sequentially allowed from 0 to 12 migration events in the analysis, and assessed their significance by stepwise comparison of AIC values (Figure S3). The best fit to the data was obtained with seven migration events, which significantly improved the log-

412 likelihood of the model (Figure S3). This population tree was bootstrapped 100 times to  
413 assess statistical support of migration edges. Three migration edges had more than 50%  
414 bootstrap support (Figure 2 and Table S8). The most robustly inferred migration event was  
415 between the Mediterranean *M. galloprovincialis* and the Kerguelen population (81 % of  
416 bootstrap replicates). The two others included migration between Northern species as  
417 expected: the European populations of *M. edulis* and *M. galloprovincialis*, and the European  
418 populations of *M. edulis* and *M. trossulus*. A migration event was also inferred between the  
419 Mediterranean *M. galloprovincialis* and the European *M. trossulus*. An edge between the  
420 Kerguelen population and the American *M. trossulus* was additionally inferred for 38% of  
421 bootstrap replicates. Migration between the Kerguelen population and the European *M. edulis*  
422 was detected, but only in 4% of bootstrap replicates.

423 Reconstruction of the divergence history with  $\delta a\delta i$  consolidated evidence for ancient  
424 migration events between the Kerguelen mussels and each Northern species. In all three  
425 pairwise comparisons, the model of ancient migration with varying rates of introgression  
426 among loci (“*AM\_2M*”) received the strongest statistical support (Table S5). Migration  
427 occurred right after the split during a relatively short period (5% to 10% of the total  
428 divergence time) and it was asymmetric with a substantial fraction (90% to 95%) of the  
429 mussel genome in the Kerguelen permeable to *M. edulis* and *M. galloprovincialis* gene flow,  
430 while being mostly resistant to *M. trossulus*. Overall, these results suggest that the Kerguelen  
431 mussel is a Southern lineage related to *M. edulis* and that it secondarily admixed with all three  
432 Northern species (*M. edulis*, *M. galloprovincialis* and to a lesser extent with *M. trossulus*) in  
433 the past.

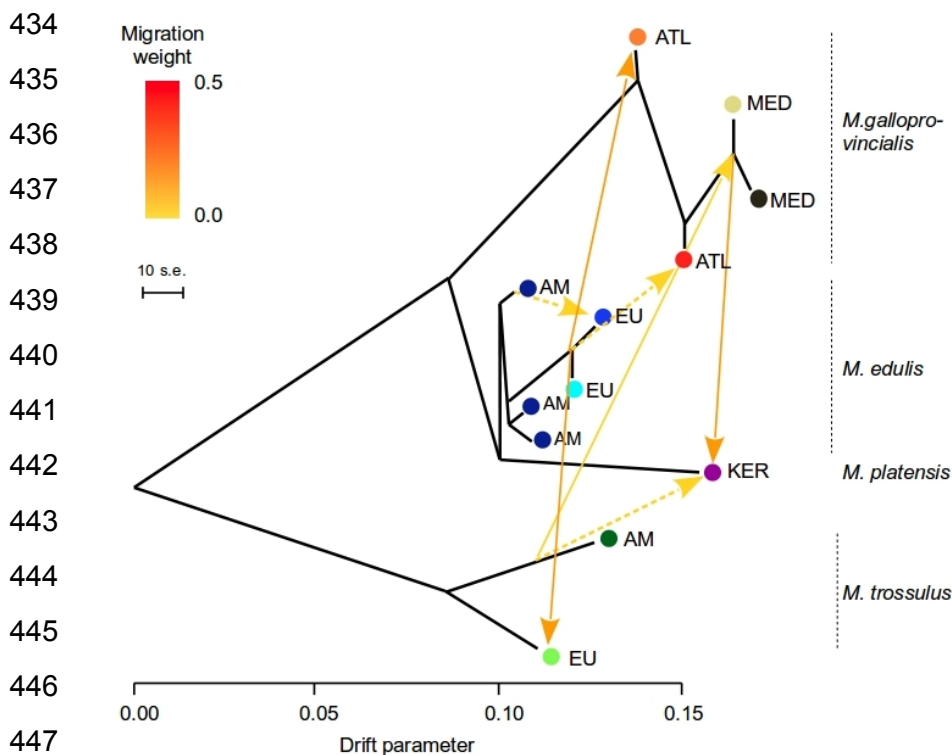

**Figure 2.** Maximum-likelihood population tree of the twelve GBS-typed *Mytilus* spp. populations inferred by *TreeMix* showing 7 migration events. ML estimation was made by using 32,162 GBS SNPs grouped in windows of 100 SNPs. Terminal nodes are labelled by locality abbreviation (Table S1) and colors match Figure 1.

448 The drift parameter is shown on the x-axis. Horizontal branch lengths are proportional to the  
 449 amount of genetic drift that has occurred in each branch. Admixture arrows are coloured  
 450 according to the migration weight, which represents the fraction of ancestry derived from the  
 451 migration edge. Migration edges with bootstrap support less than 50% are shown with dotted  
 452 lines, and those with bootstrap support less than 20% are not shown (Table S8).

### 453 Variation of admixture histories across the genome

454 To further investigate how genetic relationships varied across the genome, we quantified the  
 455 contribution of three unrooted topologies (Figure 3) to the full tree at 395 GBS contigs with  
 456 *Twisst*. Only 17% (67) of them showed resolved relationships, i.e. one of the unrooted  
 457 topology weighted 75% or more, among which 40% (27) were highly resolved (weight  $\geq$   
 458 90%). A first result of the analysis is therefore a high rate of incomplete lineage sorting. The  
 459 most represented resolved topology (39 contigs) put the Kerguelen individuals together with  
 460 *M. edulis*, while they were grouped with *M. trossulus* in 19 contigs (i.e. ancestral to the *M.*  
 461 *edulis* / *M. galloprovincialis* subgroup) and with *M. galloprovincialis* in 9 contigs (Table 1).

462 When classifying the topologies in categories, 18 contigs supported the « ancient Kerguelen  
463 divergence » scenario while 19 supported an « introgression » scenario among which 4 were  
464 from *M. trossulus*, 12 from *M. edulis* and 3 from *M. galloprovincialis*; 30 contigs could not be  
465 classified. Figure 3 illustrates representative cases of the different *Twisst* categories, including  
466 candidate loci for introgression. Panel C2 represents a complete introgression of *M. trossulus*  
467 haplotypes into the Kerguelen Islands. The clearest case is observed for a contig containing  
468 the Elongation Factor 1 alpha gene, a gene that has been previously suggested to be involved  
469 in adaptation in *M. edulis* (Bierne 2010). A similar pattern is shown on panel A2 where *M.*  
470 *edulis* haplotypes have totally replaced their Southern counterparts in the Kerguelen. Panel B2  
471 suggests a more ancient introgression of *M. galloprovincialis* haplotypes given that all  
472 haplotypes sampled in the Kerguelen form a distinct cluster within the *M. galloprovincialis*  
473 clade. These results suggest that the Kerguelen mussels have a genome of mixed ancestry,  
474 mainly dominated by *M. edulis*-related alleles from which they probably derive, but with  
475 which they also have probably secondarily admixed again. This is in contrast with the  
476 negligible *M. edulis* introgression found in the *TreeMix* analysis where the Kerguelen  
477 population was inferred to be the sister-clade of *M. edulis*. In fact, it may have been hard to  
478 fully distinguish migration from shared ancestral polymorphism only based on allele  
479 frequencies in the ML population tree. Moreover, it should be noted that all these patterns  
480 hold when using a minimal weight of 90% (Table 1).

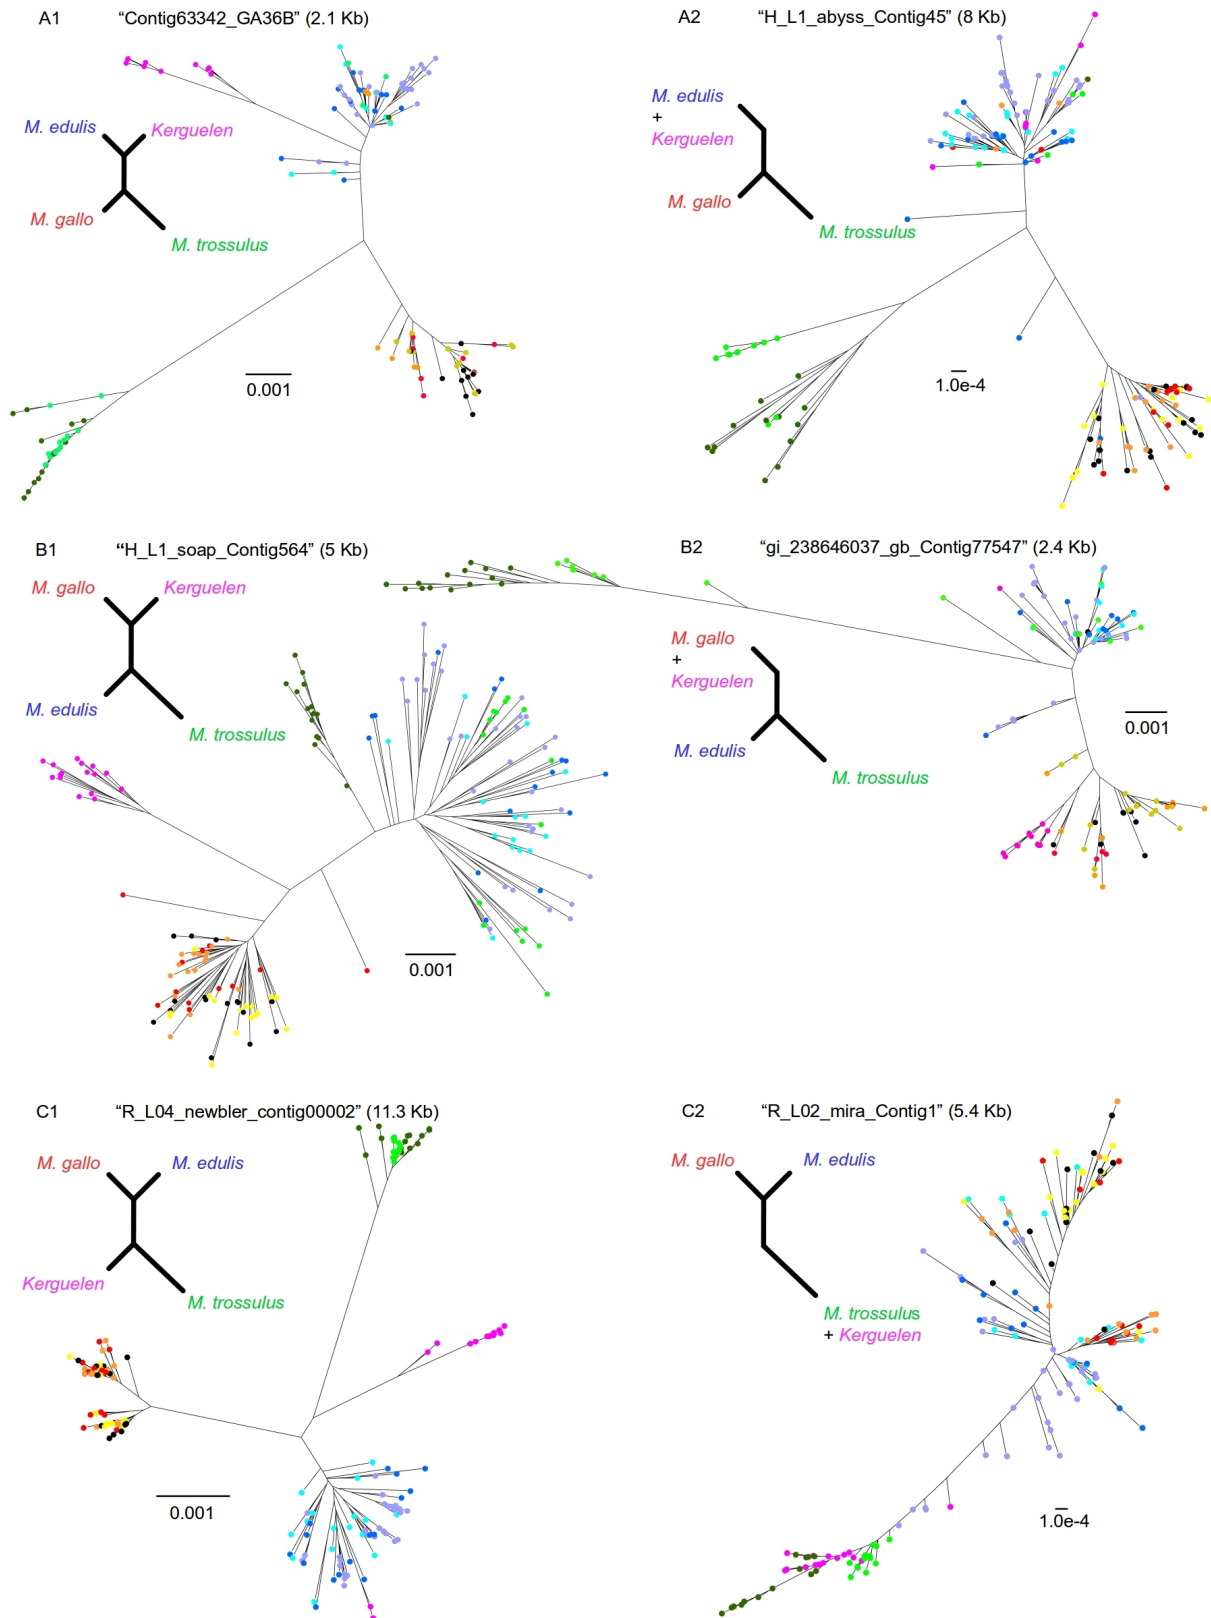



481 **Figure 3.** Summary of the different topologies. Three topologies have been weighed with  
482 *Twisst* for each of the 395 contigs, and classified in different categories depending whether the  
483 Kerguelen mussels branched as a sister-clade to a Northern species (“ancient divergence”), or  
484 were distributed within a Northern species (“introgression”). A. Kerguelen clustered with *M.*  
485 *trossulus*: A1 “ancient Kerguelen divergence” and A2: “introgression”; B. Kerguelen clustered  
486 with *M. edulis*: B1 “ancient Kerguelen divergence” and B2: “introgression”; C. Kerguelen  
487 clustered with *M. galloprovincialis*: C1 “ancient Kerguelen divergence” and C2:  
488 “introgression”. For each category, a typical neighbour-joining tree computed on the longest  
489 non-recombining block of the contig is shown (defined with the Difference of Sums of  
490 Squares method of McGuire & Wright 2000). Contig IDs correspond to Table S6, and sizes of  
491 non-recombining blocks are given in brackets. Colors match Figure 1.

#### 492 **Substantial genetic structure in the Kerguelen Islands**

493 Mussels were collected from 35 sampling sites all around the Kerguelen Islands (Figure 4A,  
494 Table S3) and successfully genotyped at 33 KASpar SNPs. Pairwise  $F_{ST}$  values across all  
495 SNPs (Table S7) revealed significant fine-scale genetic differentiation between sites from  
496 different geographic regions. Remarkably, RdA (North-East) and PCu (West) were  
497 significantly differentiated with nearly all other sites. Sites from the South, especially BdS,  
498 and from the North, especially AS, were differentiated from the Gulf of Morbihan. At a  
499 smaller scale within the Gulf of Morbihan, several sites showed genetic structure among  
500 them, but their significance level did not pass the correction for multiple tests. These results  
501 extend the study by Gérard *et al.* (2015) to many SNPs and substantiate their finding of  
502 significant genetic differentiation at different scales in the island. Further, they indicate the  
503 existence of spatial heterogeneity in dispersal-driven connectivity at the scale of the island.

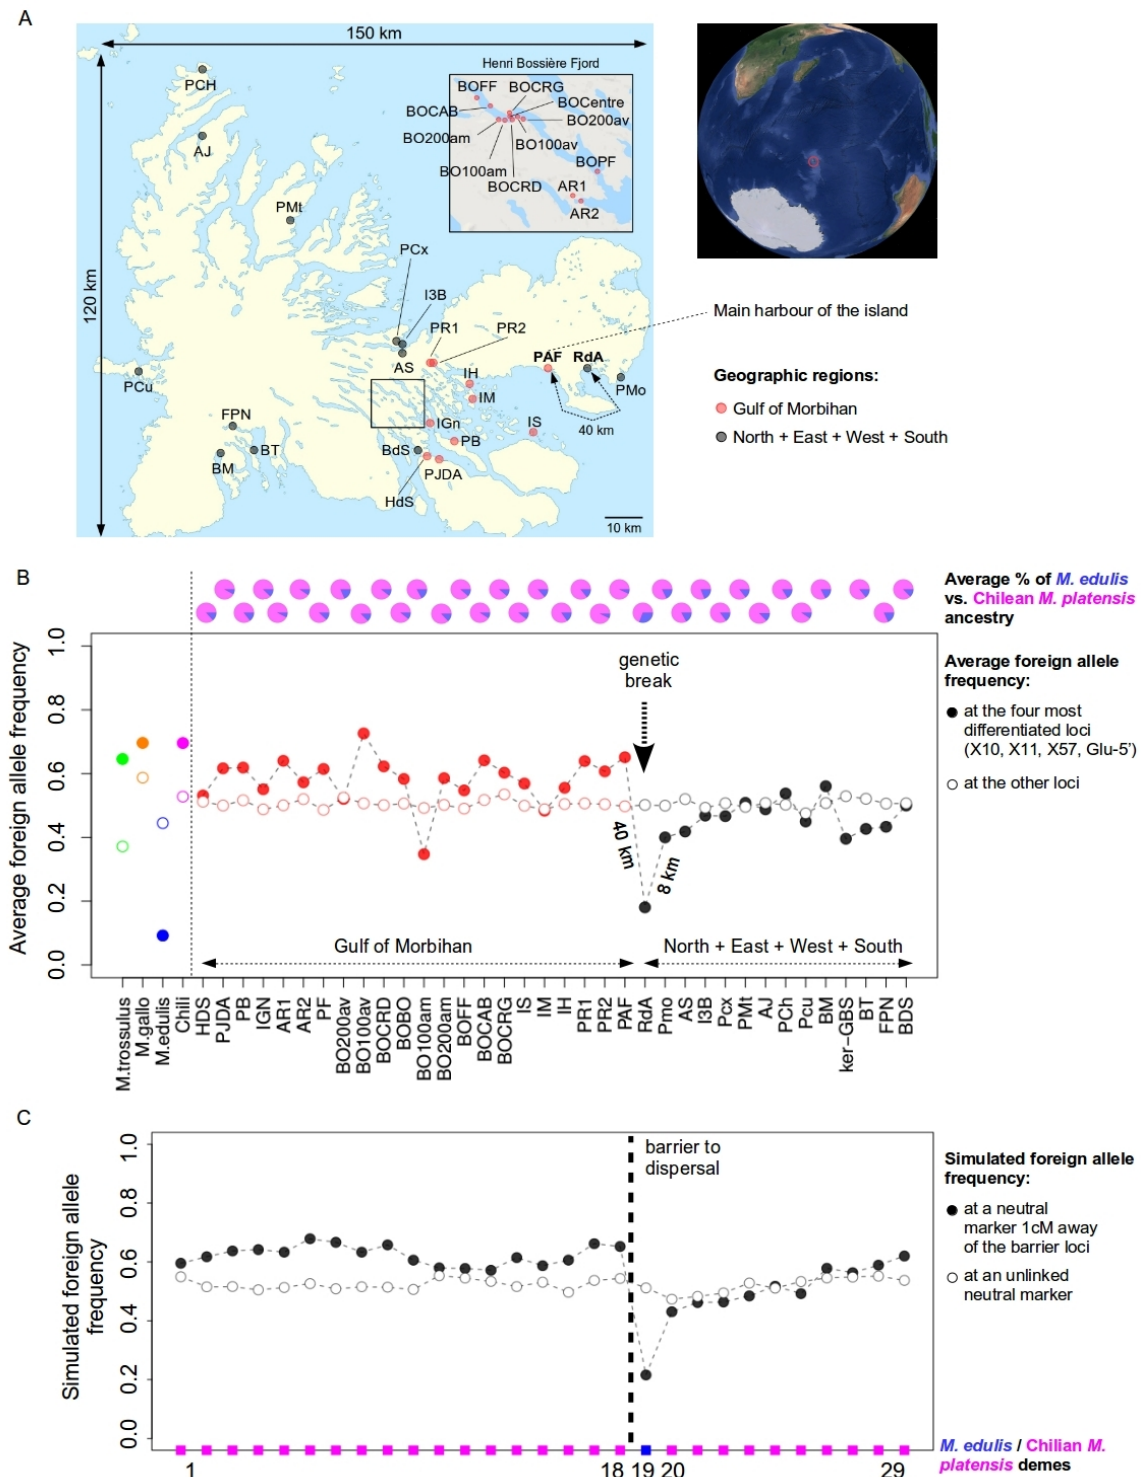

504 **Figure 4.** Geographic variation of the average foreign allele frequency across the four most  
 505 differentiated loci in the Kerguelen Islands (filled symbols, X10, X11, X57 and Glu-5' from  
 506 Gérard et al. (2015)) and the other loci (open symbols). Alleles were labelled based on their  
 507 frequencies in the *M. galloprovincialis* Atlantic population of Iberian Coast (Table S4). Red



508 points indicate sites located in the Gulf of Morbihan. **A.** Map of the Kerguelen Islands (150  
509 km East to West; 120 km North to South) together with a world map indicating its location in  
510 the Southern Ocean (surrounded in red), and an enlarged map of the Henri Bossière Fjord.  
511 Sites PAF (the main harbour of the island) and RdA are separated by 40 kms of coasts, RdA  
512 and Pmo by 8 kms, and they show a genetic break on Panel B. Sampling details are provided  
513 in Table S3. **B.** Frequency of the average foreign allele across sampling sites in the Kerguelen  
514 Islands (ordered by geography), in the three reference Northern species and in the Chilean  
515 mussels. See Figure S4 for the detailed pattern at each locus. On top, the average *M. edulis* vs.  
516 Chilean ancestries from an ADMIXTURE analysis (K=2) are shown for each site. **C.**  
517 Simulation results after 300 generations of a secondary contact between *M. edulis* and Chilean  
518 *M. platensis* mussels that meet twice on a circular stepping-stone model (between demes n°18  
519 / n°19 and demes n°19 / n°20). A physical barrier to dispersal was modelled between the *M.*  
520 *edulis* deme (n°19) and the Chilean deme n°18 (dashed vertical bar, migration rate=0.05  
521 instead of 0.5 as everywhere else). Deme size was fixed to 500 individuals, and the species  
522 barrier was asymmetric (at barrier loci, the selection coefficient against *M. edulis* in the *M.*  
523 *platensis* background was set to 0.2 while it was set to 0.5 against the *M. platensis* allele in the  
524 *M. edulis* background).

525 Global  $F_{ST}$  across all sites was calculated for each SNP and tested with 1000 permutations  
526 (Table S2). Values were non-significant after Bonferroni's correction, except at the three most  
527 differentiated loci: X10, X11 and X57. Their foreign allele, oriented based on its frequency in  
528 the Northern species (*M. galloprovincialis* Atlantic population of Iberian Coast, Table S4),  
529 was at low frequency in the North of the island, especially in the North-East sites, RdA and  
530 Pmo. In contrast, it was at higher frequency in the Gulf of Morbihan and at intermediate to  
531 low frequency in the South and West. These trends were similar to those at Glu-5' (Table S4),  
532 a nuclear marker suspected to be affected by selection in the island (Gérard *et al.* 2015) and at  
533 candidate allozymes although with fewer sampling sites (Blot *et al.* 1989). Across all sites, the  
534 frequencies of the foreign allele at Glu-5' were significantly correlated with those at X10  
535 ( $r=0.61$ ,  $p\text{-value} < 0.001$ ), X11 ( $r=0.419$ ,  $p\text{-value}=0.012$ ), and X57 ( $r=0.49$ ,  $p\text{-value}=0.003$ ),

536 but they were globally higher at Glu-5' (Figure S4).

537 The foreign allele frequency at those four loci is represented in Figure S4 and the average  
538 over the four loci in Figure 4B (filled symbols). These clearly show a genetic break between  
539 two geographically close sites, PAF and RdA (40 kms apart), and to a lesser extent between  
540 RdA and Pmo, which are separated by only 8 kms of coasts. The average frequency was the  
541 highest in the Gulf of Morbihan (from HdS to PAF), then it abruptly dropped down (in 40 km)  
542 between PAF and RdA (respectively on the West and East coast of the Prince of Wales'  
543 Peninsula), and finally increased gradually along the coast from North-East to South-West.  
544 This is in sharp contrast with the pattern observed at the other loci (open symbols) of which  
545 the average frequency remained similar across all sites.

546 An admixture analysis using all KASPar SNPs and defining *M. edulis* and the Chilean  
547 mussels as reference populations (Figure 4B, pie charts), suggests that the Kerguelen Island is  
548 occupied by mussels related to Chilean mussels (*M. platensis*), and that RdA has by far the  
549 highest level of *M. edulis* ancestry (69% compared to >81% elsewhere). We therefore  
550 hypothesize that two genetic backgrounds may be present in the island, one related to *M.*  
551 *edulis* and trapped at site RdA close to a potential density trough in the the Prince of Wales'  
552 Peninsula (as theoretically expected, Barton 1979, Barton & Hewitt 1985), and the other  
553 related to Chilean mussels and present everywhere else.

554 We illustrated this scenario by simulating a secondary contact between these two  
555 backgrounds (including a physical barrier to dispersal between demes n°18 and n°19), and  
556 tracking the frequency of the foreign allele at two neutral markers (linked and unlinked to the  
557 barrier locus) a few hundreds generations after the contact (Figure 4C). Simulations often  
558 fitted well with the observed variation in allele frequency across sites, as predicted by  
559 Gagnaire *et al.*'s model (2015), providing that the species barrier was asymmetric in order to  
560 protect the small *M. edulis* patch to be quickly swamped by *M. platensis* introgression. This

561 suggests that the genetic break at the boundary of the Gulf of Morbihan and the North-East  
562 region is better revealed by the frequency of foreign alleles at ancestry-informative loci  
563 implying a role of admixture either in the maintenance or in the detection of the genetic  
564 structure.

### 565 **Environment-associated genetic structure in the Kerguelen Islands**

566 We then tested for genetic-environment associations in the Kerguelen, i.e. for a correlation  
567 between genetic differentiation and environmental factors, independently of geographic  
568 structure. As such, we performed a redundancy analysis, RDA, (i.e., a multivariate  
569 constrained ordination) on the 695 individual genotypes sampled from the 35 sites  
570 characterized by different habitats, and estimated the relative contribution of each  
571 environmental factor on population genetic structure. Among the seven constrained factors  
572 (five qualitative variables, plus geographic coordinates), three were not significant in the  
573 initial model (Salinity, Exposure and Latitude, Table S9) and were removed from further  
574 analyses. The proportion of total genotypic variance explained by all constrained factors was  
575 highly significant in the global model (p-value=0.001, Table 2A, left panel), but quite low  
576 (2.32%). The first RDA axis, which explained 61% of the constrained variance, was mainly  
577 contributed by *Macrocystis* (Figure S5 and Table S10). Accordingly, it was the only factor  
578 whose marginal effect remained significant (p-value=0.032, Table 2B, left panel).

579 We statistically controlled for the effect of geography by performing a conditioned RDA  
580 analysis on Longitude (Table 2A, right panel). The combined effect of the three environmental  
581 variables remained significant (p-value=0.041), explaining 1.1% of the total genotypic  
582 variance. Individually, *Macrocystis* and Substrate still showed significant effects, after  
583 removing all other confounding factors (p-value=0.011 and 0.001, respectively, Table 2B,  
584 right panel). Interestingly, it has been previously shown that the fine-scale genetic variation at

585 Glu-5' was also significantly correlated with *Macrocystis* (Gérard *et al.* 2015). In agreement,  
586 we found a significant correlation between the average foreign allele frequency at the four  
587 most differentiated loci in the Kerguelen Islands and the presence/absence of *Macrocystis*  
588 (Figure 5A), whereas there was no correlation with the other loci (Figure 5B). This suggests  
589 either that the environment constraints a moderate connectivity, or that adaptation may be  
590 polygenic and connectivity extensive at the scale of the island, such that outlier-based  
591 methods are not suitable in the Kerguelen (Le Corre & Kremer 2012).

592 The sharp genetic break between RdA and PAF further indicates that two genetic  
593 backgrounds may have been locally trapped by an ecological boundary or a region of reduced  
594 dispersal (Bierne *et al.* 2011). Accordingly, there is an oceanic threshold at the entrance of the  
595 Gulf of Morbihan that impedes exchanges with water masses from outside; and at a larger  
596 scale, the Antarctic circumpolar current moves the water masses from West to East causing  
597 gyres and turbulences on the North-Eastern coast and pushing water masses far to the East  
598 (Karin Gerard, pers. comm.). Thus, the water masses between the Gulf of Morbihan and the  
599 North Coast do not mix well, suggesting that exchanges between the two sites are limited.  
600 Moreover, these two sites differ at all five ecological variables (Table S3), but not in the  
601 direction predicted: RdA shows an habitat characteristic of the Gulf of Morbihan while being  
602 located on the East coast and having the lowest foreign allele frequency (and the reverse is  
603 true for PAF). This imperfect correlation between genotypes and habitats suggests that  
604 enhanced genetic drift and intense gene flow in the island grambled the signal at our markers.

605

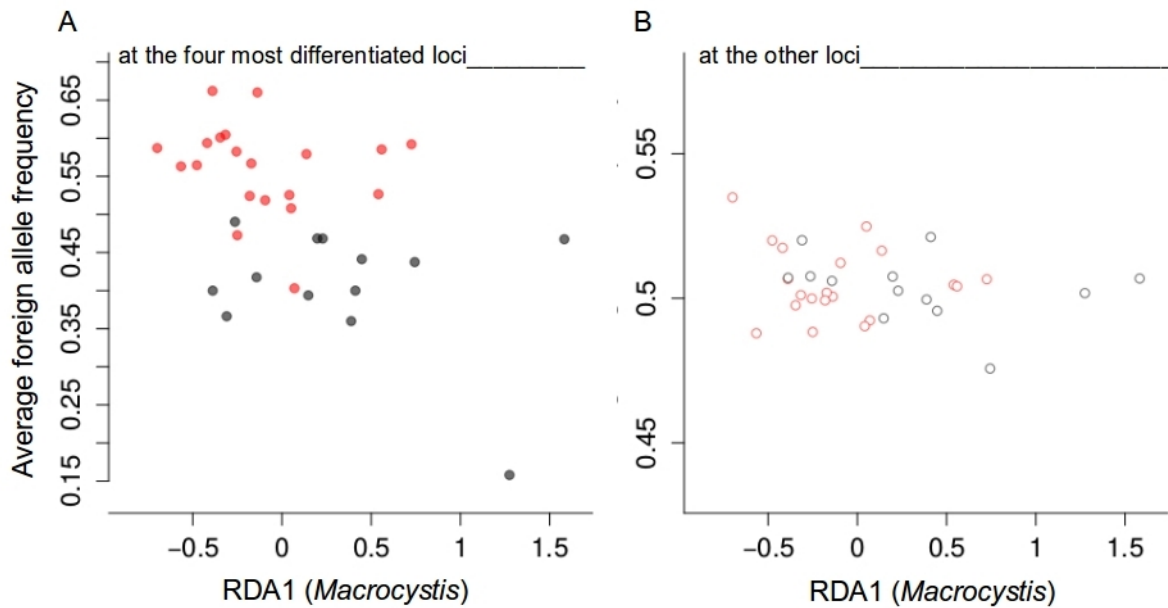

606 **Figure 5.** Correlation between the average foreign allele frequency of the four most  
607 differentiated loci (A) and other loci (B) at each sampling site and the presence/absence of  
608 *Macrocystis* (i.e., the average site coordinates on the first axis of the *Macrocystis* RDA, see  
609 Table S121). Pearson correlation coefficient: on the left panel, 0.494 (p=0.003); on the right  
610 panel, 0.107 (p=0.541). Red points indicate sites located in the Gulf of Morbihan (see Figure  
611 4A).

### 612 **Most differentiated SNPs in the Kerguelen Islands are primarily ancestry-informative in** 613 **the Northern Hemisphere**

614 In the total sample, the average allele frequency of the foreign allele was 0.417 at Glu-5',  
615 0.503 at X10, 0.619 at X11 and 0.480 at X57. These polymorphisms were surprisingly well-  
616 balanced in the island, despite being species-specific in the Northern species (Table S2, also  
617 see Gérard *et al.* 2015 for Glu-5'). To investigate whether local adaptation in the island was  
618 primarily depending on ancestry-informative loci in the Northern complex of species, we  
619 compared the degree of differentiation between sites in the Kerguelen Islands and that of the  
620 Northern species, *M. edulis* and *M. galloprovincialis*, at the 33 KASPar SNPs (Figure 6).  
621 Panel A shows that the level of genetic differentiation among sites in the Kerguelen (global

622  $F_{ST}$ , Table S2) was significantly higher (p-value=0.021) for the ancestry-informative loci  
623 (mean=0.015, in orange) compared to the control loci (mean=0.007, in grey). Importantly, the  
624 difference between the two categories was also significant when considering the genetic-by-  
625 environment association across all variables (Panel B: mean\_orange=0.112,  
626 mean\_grey=0.048, p-value=0.006), which was measured by the locus coordinates on the first  
627 axis of the conditioned RDA (Table S11); or only including *Macrocystis* (Table S12:  
628 mean\_orange=0.089, mean\_grey=0.041, p-value=0.016). Moreover, these patterns hold when  
629 adding the locus Glu-5' (Figure S6) in the case of genetic differentiation (Panel A, p-  
630 value=0.01), and genetic-environment associations (Panel B, p-value=0.004) measured by the  
631  $F_{CT}$  from an AMOVA analysis performed by grouping sites according to the presence/absence  
632 of *Macrocystis* (see Gérard *et al.* 2015).

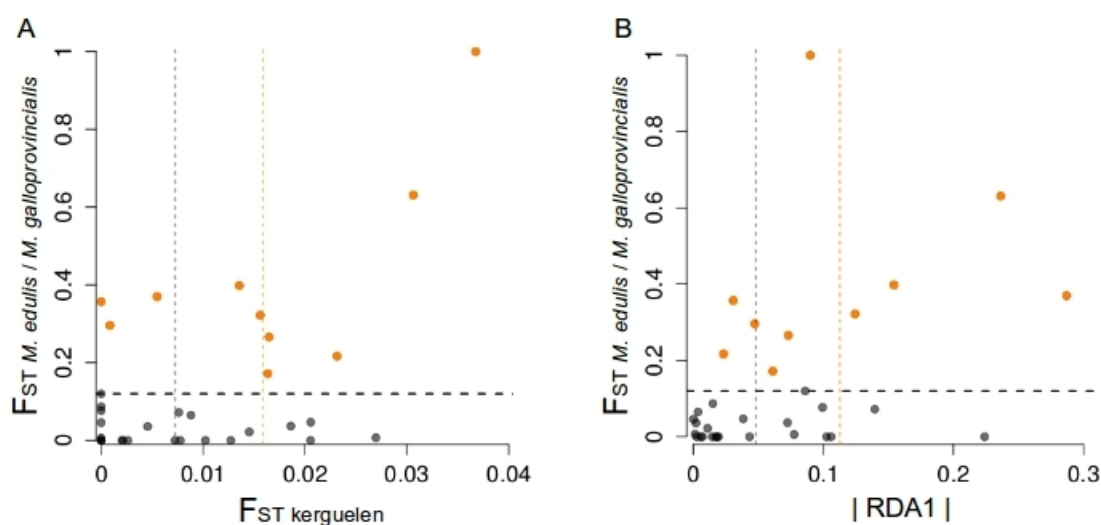

633 **Figure 6.** Correlation between the level of differentiation among the Kerguelen Islands (x-  
634 axis) and the Northern species ( $F_{ST}$ , y-axis) at each KASPar SNP. Panel (A) shows the genetic  
635 differentiation between Kerguelen populations (global  $F_{ST}$ ); and panel (B) shows the genetic-  
636 by-environment association (locus coordinates on the first axis of the conditioned RDA  
637 (absolute values), see Table S11). Northern species are *M. edulis* (European population of the  
638 North Sea) and *M. galloprovincialis* (Mediterranean population of the West basin). Ancestry-  
639 informative loci, i.e.,  $F_{ST} M.edulis\_M.galloprovincialis} > 0.120$  (horizontal dashed line, see Table

640 S2), are depicted in orange. Wilcoxon's test between the ancestry-informative loci (orange)  
641 and the controls (grey): (A) mean\_orange=0.015, mean\_grey=0.007 (p-value=0.021); (B)  
642 mean\_orange=0.112, mean\_grey=0.048 (p-value=0.006). Their respective means are depicted  
643 by vertical dashed lines. Pearson correlation coefficient: (A)  $r=0.540$  (p-value=0.001); (B)  
644  $r=0.439$  (p-value=0.011).

## 645 **Discussion**

646 Gene trees are not species trees (Nichols 2001), and the primary cause in eukaryotes is  
647 thought to be incomplete lineage sorting between closely-related species (Mallet *et al.* 2016).  
648 Nevertheless, recent genomic studies, e.g., *Anopheles gambiae* mosquitoes (Fontaine *et al.*  
649 2015), *Xiphophorus* fishes (Cui *et al.* 2013), African lake cichlids (Meier *et al.* 2017),  
650 Caribbean *Cyprinodon* pupfishes (Richards & Martin 2017) or *Heliconius* butterflies (Martin  
651 *et al.* 2013), recognized a prominent role of introgressive hybridization as a source of  
652 reticulate phylogenies. This is particularly true in species complexes, such as *Mytilus* mussels,  
653 in which incompletely isolated species with overlapping ranges commonly exchange genes  
654 via introgressive hybridization (Fraïsse *et al.* 2016).

655 Here we confirmed that the reticulated evolution of the Southern Hemisphere Kerguelen  
656 mussels, which was suggested by a handful of nuclear markers (Borsa *et al.* 2007) and  
657 mitochondrial DNA (Hilbish *et al.* 2000; Gérard *et al.* 2008), holds at a genome-wide scale.  
658 We first analyzed their genetic relationship with the three Northern species (*M. edulis*, *M.*  
659 *galloprovincialis* and *M. trossulus*) at 1269 contigs (51,878 SNPs), and we demonstrated that  
660 mussels in the Kerguelen Islands belong to a Southern lineage. We further showed based on a  
661 maximum-likelihood population tree that the Kerguelen population is the sister clade of *M.*  
662 *edulis*, which suggests that Kerguelen mussels originated from an ancestor of *M. edulis* and  
663 *M. platensis* that migrated to the South. This Atlantic-Pleistocene scenario predicts that the  
664 divergence between mussel populations in the two hemispheres is relatively recent (~0.5 to



665 ~1.3 mya, Gérard *et al.* 2008), and thus explains their large shared ancestry. Furthermore, the  
666 deep branching of the Southern mtDNA clade observed by Gérard *et al.* (2008) would  
667 therefore be explained either by ancestral polymorphism or more likely by introgression  
668 swamping at the time of contact between *M. edulis* and *M. galloprovincialis* (Smietanka *et al.*  
669 2010).

670 Our population tree inference provides evidence of secondary genetic exchanges with  
671 Northern mussels that occurred after the first establishment in the Southern Hemisphere. This  
672 was confirmed by reconstructing their divergence history, which further suggested that  
673 introgression occurs at variable rates across the genome with some genomic regions resistant  
674 to gene flow (and carrying interspecific barriers) while others are essentially permeable. The  
675 resulting genome-wide ancestry variation was estimated by applying a new topology  
676 weighting method to each GBS sequence (Martin & Van Belleghem 2016), which weighted  
677 the contribution of three topologies to the full tree. The majority of the genome showed  
678 evidence of incomplete lineage sorting, with only 17% of the regions that have a resolved  
679 topology. However, most of these regions (51%) show clear evidence of admixture, i.e., the  
680 Kerguelen haplotypes were all (or part of) nested within a Northern clade. Most of the cases  
681 involved introgression from *M. edulis*, whereas *M. trossulus* and *M. galloprovincialis*  
682 contributed to a lesser extent. It is also possible that Australasian *M. planulatus* mussels that  
683 are related to *M. galloprovincialis* according to our SNP data, could have contributed to the  
684 reticulated history.

685 At some GBS loci, Kerguelen mussels possessed alleles characteristic of both *M. edulis* and  
686 *M. galloprovincialis* or *M. trossulus* indicating polymorphism for Northern species-specific  
687 alleles in the Kerguelen. Importantly, these loci did not depart from Hardy-Weinberg and  
688 linkage equilibrium as exemplified by an ADMIXTURE analysis (Figure S7) in which the  
689 Kerguelen mussels appeared as a well demarcated panmictic cluster. Therefore, contrary to



690 what is known in Northern hybrid zones (Bierne *et al.* 2003), there is no evidence of  
691 reproductive barriers impeding admixture in the Kerguelen Islands. Several hypotheses can be  
692 proposed: (i) a weaker reproductive barrier between Northern backgrounds at the time of  
693 contact in the south; or (ii) an insufficient barrier to gene flow under the demographic and  
694 environmental conditions, specifically strong genetic drift, high-potential for hybridization in  
695 this small isolated island, or a strong demographic asymmetry between the native and the  
696 introduced populations. The first hypothesis highlights the importance of Dobzhansky-Müller  
697 incompatibilities for reproductive isolation (Coyne & Orr 2004), and may explain how *M.*  
698 *edulis*, *M. galloprovincialis* and *M. trossulus* alleles at different loci can co-exist into a single  
699 Southern population that did not evolve their incompatible interactors, as opposed to the  
700 Northern populations. The second hypothesis highlights that the outcome of hybridization can  
701 be highly dependent on the demographic context.

702 Finally, by collecting mussels from contrasted habitats, we demonstrated significant  
703 differentiation across 35 sampling sites at the scale of the island, and at a smaller scale  
704 between geographically close sites, especially within the Gulf of Morbihan. As found by  
705 Gérard *et al.* (2015) at Glu-5', and previously at allozyme loci (Blot *et al.* 1989), the most  
706 significant structure was observed between the North-South coasts and the Gulf of Morbihan,  
707 with a genetic break between RdA and PAF at the three most differentiated loci. Although  
708 enhanced genetic drift is expected in this small (150 km East to West; 120 km North to South,  
709 that should be compared to a dispersal distance of 50 km per generation on average) and  
710 isolated island (4,100 km from South Africa; 4,000 km from Australia), the fine-scale genetic  
711 structure observed in such a high-dispersal species as mussels is at first sight at odds with  
712 selective neutrality. So, we explicitly tested the role of habitat heterogeneity in explaining this  
713 differentiation. Our RDA analysis shows that genetic variation was associated with habitats,  
714 even after controlling for spatial effects; and the most important factors were the presence of

715 *Macrocystis* kelps, substrate type and slope. Despite being low, this significant habitat-driven  
716 genetic differentiation could suggest a role of selection.

717 Firstly, it could be due to local adaptation of the mussels opposed by gene flow between  
718 habitats. Accordingly, we observed a significant correlation between the presence/absence of  
719 *Macrocystis* and the average foreign allele frequency at the four most differentiated loci. This  
720 points toward a primary effect of *Macrocystis*, which is a keystone species in marine  
721 ecosystems that forms kelp forest serving as substrata and refuge for many molluscs species,  
722 including *Mytilus* (Adami & Gordillo, 1999), in areas exposed to wave action. Nevertheless,  
723 the RdA site, which has the lowest foreign allele frequency, is not occupied by *Macrocystis*  
724 kelp, weakening this local adaptation hypothesis.

725 Alternatively, the consistent genetic patterns observed across several physically unlinked  
726 loci indicate the possible existence of two genetic backgrounds maintained at the scale of the  
727 island. We propose, and illustrate by simulations, that a genetic background related to *M.*  
728 *edulis* is trapped at RdA and surrounded by another genetic background related to Chilean *M.*  
729 *platensis* mussels and present everywhere else. The enclosed location of the genetic  
730 background at RdA explains that it is strongly introgressed at most markers and thus hard to  
731 detect. However, the physical barrier to dispersal between sites PAF and RdA produces a clear  
732 genetic break on the West side of the contact. Introgression between the two backgrounds  
733 generates gradients in allele frequencies, which are better correlated with habitat variation  
734 than geographical distance. The foreign allele (as defined by its frequency in the *M.*  
735 *galloprovincialis* Atlantic population of Iberian Coast) tended to be at higher frequency in  
736 shallow sites sheltered from the influence of open marine waters with a low salinity and flat-  
737 sandy bottoms, mainly in the inner part of the Gulf of Morbihan. These sites are characterized  
738 by an absence of *Macrocystis* kelp beds, as opposed to exposed rocky shores. Port aux  
739 Français (PAF) is also the harbour where ships arrive and it is the best place for the arrival of

740 non-native genetic backgrounds. Interestingly, *M. galloprovincialis* alleles are found more  
741 frequent in exposed, rather than sheltered sites in the hybrid zone between *M. edulis* and *M.*  
742 *galloprovincialis* in Europe, which would suggest inverted genetic-environment associations  
743 between hemispheres as predicted by the coupling hypothesis (Bierne *et al.* 2011). This  
744 hypothesis proposes that genetic-environment associations can easily be revealed by  
745 intrinsically maintained genetic backgrounds in linkage disequilibrium with local adaptation  
746 genes, and that the phase of the disequilibrium can reverse when contacts are replicated as  
747 could have happened in Southern Hemisphere mussels. Overall, these findings reinforce the  
748 idea that genetic variation can be maintained at fine geographical scales in high-dispersal  
749 organisms, as recently shown in Chilean mussels (Araneda *et al.* 2016) or in passerine birds  
750 (Szulkin *et al.* 2016, Perrier *et al.* 2017). In these examples however the link with a possible  
751 history of admixture has not been investigated.

752 Although we had the hypothesis that secondary contact could be an explanation of the  
753 micro-structure observed in the Kerguelen (Gérard *et al.* 2015), we could not know which  
754 backgrounds were in interaction on the sole basis of the GBS data of a single sample.  
755 However, our procedure of identifying SNPs that were both polymorphic in the Kerguelen  
756 and highly differentiated between Northern Hemisphere species proved to be an interesting  
757 procedure to enrich for loci able to reveal the micro-geographic structure in the Kerguelen.  
758 Luckily the sample we used for the GBS analysis was localised in the introgression cline  
759 (sample "ker-GBS", Figure 4B), and this can also explain why the enrichment procedure was  
760 successful. This is exemplified with the genealogy around locus X10 (Figure S8), which  
761 shows that a SNP that differentiates *M. edulis* from other Northern species, and was  
762 polymorphic in the Kerguelen Islands, is able to reveal the cline of introgressed *M. edulis*  
763 allele we observed in the island.

764 In this work, we show that the most differentiated SNPs in the Kerguelen and those that

765 most strongly drive the genetic-environment associations are primarily ancestry - informative,  
766 suggesting that maintenance of genetic differentiation at a small spatial scale, and possibly  
767 adaptation to fine-scale environmental variations in the island, may have been facilitated by  
768 secondary admixture and introgression of alleles from Northern species. These foreign alleles  
769 may have adaptively introgressed the Southern background in the Kerguelen, as it has been  
770 already reported at *mac-1* between *M. edulis* and *M. galloprovincialis* along the French coast  
771 (Fraïsse *et al.* 2014) and at many other loci in the whole complex of species of the Northern  
772 Hemisphere (Fraïsse *et al.* 2016). However, the signal is probably erasing because of  
773 recombination between adaptive alleles and our neutral markers, and is also probably further  
774 blurred by genetic drift. A number of examples of adaptive introgression of complex traits  
775 have been documented in plants (e.g., resistance to drought in *Helianthus*, Vekemans 2010),  
776 and terrestrial animals (e.g., mimicry-determining loci in *Heliconius*, Heliconius Genome  
777 Consortium 2012; or insecticide resistance loci in *Anopheles*, Norris *et al.* 2015). Such  
778 adaptive variation could even serve as a source of genetic variation that subsequently became  
779 recombined into novel trait and favoured the emergence of new lineages, as proposed in  
780 cichlid fishes of Africa's Lake Victoria (Meier *et al.* 2017).

781 A central question is whether admixture is a simple source of variation on which local  
782 selection can effectively act or if the initial linkage disequilibria between foreign alleles in the  
783 donor background are required for the successful emergence of micro-geographic adaptation  
784 (or speciation in the case of cichlids) and are maintained rather than built-on. In the case of  
785 Kerguelen mussels, the evidences we gained here for the maintenance of linkage  
786 disequilibrium are limited and indeed rather support extensive recombination. However our  
787 markers have likely lost too much signal to answer the question. Our results are very  
788 promising that a genome-wide survey in which the direct targets of selection will be identified  
789 should bring insightful information about the issue of adaptation from admixture-enhanced

790 standing variation. For now, we can simply say that admixture between native and non-  
791 indigenous mussels has something to do with the enhancement of a micro-geographic  
792 structure in the small isolated island of Kerguelen. Maybe local adaptation is operating at loci  
793 linked to the candidate SNPs, but most probably these markers simply better reveal a genome-  
794 wide signal of habitat constrained connectivity (Gagnaire *et al.* 2015).

## 795 **Acknowledgements**

796 Jean-Pierre Féral and Christian Marschal provided the eight Kerguelen specimens used for  
797 GBS during the PROTEKER campaign (Programme IPEV n°1044). Other Kerguelen samples  
798 (>600) were collected during scientific program IPEV-MACROBENTHOS n° 195 (1999-  
799 2003) by the technical volunteers (VATs) from IPEV missions 49–53 in Kerguelen. This work  
800 was funded by the Research Network GDR 3445 cnrs ifremer MarCo and the Agence  
801 Nationale de la Recherche (HYSEA project, ANR-12-BSV7-0011). This is article 2015-130 of  
802 Institut des Sciences de l'Evolution de Montpellier.

## 803 **References**

- 804 ● Adami ML, Gordillo S (1999) Structure and dynamics of the biota associated with  
805 *Macrocystis pyrifera* (Phaeophyta) from the Beagle Channel, Tierra del Fuego. *Sci.*  
806 *Mar.*, 63(S1), 183–191.
- 807 ● Alexander DH, Novembre J, Lange K (2009) Fast model-based estimation of ancestry  
808 in unrelated individuals. *Genome Res.*, 19, 1655–1664.
- 809 ● Araneda C, Larraín MA, Hecht B, Narum S (2016) Adaptive genetic variation  
810 distinguishes Chilean blue mussels (*Mytilus chilensis*) from different marine  
811 environments. *Ecol. Evol.*, 6, 3632–3644.
- 812 ● Arnold ML (2004) Transfer and origin of adaptations through natural hybridization:  
813 were Anderson and Stebbins right? *The Plant cell*, 16, 562–570.

- 814 ● Barton NH, Hewitt GM (1985) Analysis of hybrid zones. *Annu. Rev. Ecol. Evol. Syst.*,  
815 16(1), 113–148.
- 816 ● Barton NH (1979) The dynamics of hybrid zones. *Heredity*, 43(3), 341.
- 817 ● Belkhir K, Borsa P, Chikhi L, Raufaste N, Bonhomme F (2002) GENETIX 4.03,  
818 Logiciel Sous Windows Pour la Génétique Des Populations. Laboratoire Génome,  
819 Populations, Interactions: CNRS UMR. 5000. Université Montpellier 2, Montpellier,  
820 France.
- 821 ● Benjamini Y, Hochberg Y (2000) On the Adaptive Control of the False Discovery Rate  
822 in Multiple Testing with Independent Statistics. *Journal of educational and*  
823 *Behavioral Statistics*, 25, 60–83.
- 824 ● Bierne N, Welch J, Loire E, Bonhomme F, David P (2011) The coupling hypothesis:  
825 why genome scans may fail to map local adaptation genes. *Mol. Ecol.*, 20, 2044–2072.
- 826 ● Bierne N (2010) The distinctive footprints of local hitchhiking in a varied environment  
827 and global hitchhiking in a subdivided population. *Evolution*, 64, 3254–3272.
- 828 ● Bierne N, Borsa P, Daguin C, Jollivet D, Viard F, Bonhomme F, David P (2003)  
829 Introgression patterns in the mosaic hybrid zone between *Mytilus edulis* and *M.*  
830 *galloprovincialis*. *Mol. Ecol.*, 12, 447–461.
- 831 ● Blot M, Thiriot-Quiévreux C, Soyer J (1988) Genetic relationships among populations  
832 of *Mytilus desolationis* from Kerguelen, *M. edulis* from the North Atlantic and *M.*  
833 *galloprovincialis* from the Mediterranean. *Mar. Ecol. Prog. Ser.*, 44, 239–247.
- 834 ● Blot M, Thiriot-Quivreux C, Soyer J (1989) Genetic differences and environments of  
835 mussel populations in Kerguelen Islands. *Polar Biol.*, 10, 167–174.
- 836 ● Borsa P, Rolland V, Daguin-Thiébaud C (2012) Genetics and taxonomy of Chilean  
837 smooth-shelled mussels, *Mytilus spp.* (Bivalvia: Mytilidae). *Comptes rendus biologies*,  
838 335(1), 51–61.
- 839 ● Borsa P, Daguin C, Bierne N (2007) Genomic reticulation indicates mixed ancestry in  
840 Southern-Hemisphere *Mytilus spp.* mussels. *Biol. J. Linn. Soc.*, 92, 747–754.
- 841 ● Browning SR, Browning BL (2007) Rapid and accurate haplotype phasing and  
842 missing-data inference for whole-genome association studies by use of localized

- 843 haplotype clustering. *Am. J. Hum. Genet.*, 81, 1084–1097.
- 844 ● Christe C, Stölting KN, Paris M, Fraïsse C, Bierne N, Lexer C (2017) Adaptive  
845 evolution and segregating load contribute to the genomic landscape of divergence in  
846 two tree species connected by episodic gene flow. *Mol Ecol*, 26, 59–76.
- 847 ● Cowen RK, Sponaugle S (2009) Larval Dispersal and Marine Population  
848 Connectivity. *Annu. Rev. Mar. Sci.*, 1, 443–466.
- 849 ● Coyne JA, Allen Orr H (2004) Speciation. Sinauer Associates Incorporated.
- 850 ● Cui R, Schumer M, Kruesi K, Walter R, Andolfatto P, Rosenthal GG (2013)  
851 Phylogenomics reveals extensive reticulate evolution in *Xiphophorus* fishes.  
852 *Evolution*, 67, 2166–2179.
- 853 ● Felsenstein J, Churchill GA (1996) A Hidden Markov Model approach to variation  
854 among sites in rate of evolution. *Mol. Biol. Evol.*, 13, 93–104.
- 855 ● Fontaine MC, Pease JB, Steele A *et al.* (2015) Mosquito genomics. Extensive  
856 introgression in a malaria vector species complex revealed by phylogenomics.  
857 *Science*, 347, 1258524.
- 858 ● Fraïsse C, Belkhir K, Welch JJ, Bierne N (2016) Local interspecies introgression is the  
859 main cause of extreme levels of intraspecific differentiation in mussels. *Mol. Ecol.*, 25,  
860 269–286.
- 861 ● Fraïsse C, Roux C, Welch JJ, Bierne N (2014) Gene-flow in a mosaic hybrid zone: is  
862 local introgression adaptive? *Genetics*, 197, 939–951.
- 863 ● Gagnaire P-A, Broquet T, Aurelle D, Viard F, Souissi A, Bonhomme F, Arnaud-Haond  
864 S, Bierne N (2015) Using neutral, selected, and hitchhiker loci to assess connectivity  
865 of marine populations in the genomic era. *Evol. App.*, 8, 769–78
- 866 ● Gaitán-Espitia JD, Quintero-Galvis JF, Mesas A, D’Elía G (2016) Mitogenomics of  
867 southern hemisphere blue mussels (Bivalvia: Pteriomorpha): Insights into the  
868 evolutionary characteristics of the *Mytilus edulis* complex. *Sci. Rep.*, 6, 26853.
- 869 ● Gérard K, Bierne N, Borsa P, Chenuil A, Féral J-P (2008) Pleistocene separation of  
870 mitochondrial lineages of *Mytilus* spp. mussels from Northern and Southern  
871 Hemispheres and strong genetic differentiation among southern populations. *Mol.*



- 872 *Phylogenet. Evol.*, 49, 84–91.
- 873 ● Gérard K, Roby C, Bierne N, Borsa P, Féral JP, Chenuil A (2015) Does natural  
874 selection explain the fine scale genetic structure at the nuclear exon Glu-5' in blue  
875 mussels from Kerguelen? *Ecol. Evol.*, 5, 1456–1473.
- 876 ● Goudet J (2005) hierfstat, a package for r to compute and test hierarchical F-statistics.  
877 *Mol. Ecol. notes*, 5, 184–186.
- 878 ● Gutenkunst RN, Hernandez RD, Williamson SH, Bustamante CD (2009) Inferring the  
879 Joint Demographic History of Multiple Populations from Multidimensional SNP  
880 Frequency Data. *PLOS Genetics* 5(10), e1000695.
- 881 ● Hedrick PW (2013) Adaptive introgression in animals: examples and comparison to  
882 new mutation and standing variation as sources of adaptive variation. *Mol. Ecol.*, 22,  
883 4606–4618.
- 884 ● Heliconius Genome Consortium (2012) Butterfly genome reveals promiscuous  
885 exchange of mimicry adaptations among species. *Nature* 487, 94–8.
- 886 ● Hilbish TJ, Mullinax A, Dolven SI, Meyer A, Koehn RK, Rawson PD (2000) Origin of  
887 the antitropical distribution pattern in marine mussels (*Mytilus spp.*): routes and  
888 timing of transequatorial migration. *Mar. Biol.*, 136, 69–77.
- 889 ● Hoban S, Kelley JL, Lotterhos KE, Antolin MF, Bradburd G, Lowry DB, Poss ML,  
890 Reed LK, Storfer A, Whitlock MC (2016) Finding the genomic basis of local  
891 adaptation: pitfalls, practical solutions, and future directions. *Am. Nat.*, 188, 379–397.
- 892 ● Holliday NP, Read JF (1998) Surface oceanic fronts between Africa and Antarctica.  
893 *Deep Sea Research Part I: Oceanographic Research Papers*, 45, 217–238.
- 894 ● Koehn RK, Bayne BL, Moore MN, Siebenaller JF (1980) Salinity related  
895 physiological and genetic differences between populations of *Mytilus edulis*. *Biol. J.*  
896 *Linn. Soc.*, 14, 319–334.
- 897 ● Le Corre V, Kremer A (2012) The genetic differentiation at quantitative trait loci under  
898 local adaptation. *Mol. Ecol.*, 21, 1548–1566.
- 899 ● Lee KM, Coop G (2017) Distinguishing among modes of convergent adaptation using  
900 population genomic data. *Genetics*, 207(4), 1591–1619.



- 901 ● Legendre P, Fortin MJ (2010) Comparison of the Mantel test and alternative  
902 approaches for detecting complex multivariate relationships in the spatial analysis of  
903 genetic data. *Mol. Ecol. Resour.*, 10(5), 831–844.
- 904 ● Lenormand T (2002) Gene flow and the limits to natural selection. *Trends Ecol. Evol.*,  
905 17, 183–189.
- 906 ● Mallet J, Besansky N, Hahn MW (2016) How reticulated are species? *BioEssays*, 38,  
907 140–149.
- 908 ● Martin SH, Dasmahapatra KK, Nadeau NJ, Salazar C, Walters JR, Simpson F, Blaxter  
909 M, Manica A, Mallet J, Jiggins CD (2013) Genome-wide evidence for speciation with  
910 gene flow in *Heliconius* butterflies. *Genome Res.*, 23, 1817–1828.
- 911 ● Martin SH, Van Belleghem SM (2016) Exploring evolutionary relationships across the  
912 genome using topology weighting. *Genetics*, 206, 429–438.
- 913 ● McDonald JH, Seed R, Koehn RK (1991) Allozymes and morphometric characters of  
914 three species of *Mytilus* in the Northern and Southern Hemispheres. *Marine Biol.*, 111,  
915 323–333.
- 916 ● McGuire G, Wright F (2000) TOPAL 2.0: Improved Detection of Mosaic Sequences  
917 within Multiple Alignments. *Bioinformatics*, 16(2), 130–134.
- 918 ● Meier JJ, Sousa VC, Marques DA, Marques DA, Selz OM, Wagner CE, Excoffier L,  
919 Seehausen O (2017) Demographic modelling with whole-genome data reveals parallel  
920 origin of similar *Pundamilia* cichlid species after hybridization. *Mol. Ecol.*, 26, 123–  
921 141.
- 922 ● Nichols, R. (2001). Gene trees and species trees are not the same. *Trends Ecol. Evol.*,  
923 16, 358–364.
- 924 ● Norris LC, Main BJ, Lee Y, Collier TC, Fofana A, Cornel AJ, Lanzaro GC (2015)  
925 Adaptive introgression in an African malaria mosquito coincident with the increased  
926 usage of insecticide-treated bed nets. *Proc. Natl. Acad. Sci.*, 112, 815–820.
- 927 ● Oksanen J, *et al.* (2017) vegan: Community Ecology Package. R package version 2.4-  
928 2. <https://CRAN.R-project.org/package=vegan>
- 929 ● Palumbi SR (1992) Marine speciation on a small planet. *Trends Ecol. Evol.*, 7, 114–

- 930 118.
- 931 ● Paradis E (2010) pegas: an R package for population genetics with an integrated-  
932 modular approach. *Bioinformatics*, 26, 419–420.
- 933 ● Perrier C, Lozano del Campo A, Szulkin M, Demeyrier V, Gregoire A, Charmantier A  
934 (2017) Great tits and the city: distribution of genomic diversity and gene -  
935 environment associations along an urbanization gradient. *Evol. App.*,  
936 doi:10.1111/eva.12580
- 937 ● Pickrell JK, Pritchard JK (2012) Inference of population splits and mixtures from  
938 genome-wide allele frequency data. *PLoS Genet.*, 8, e1002967.
- 939 ● Rawson PD, Hilbish TJ (1995) Evolutionary relationships among the male and female  
940 mitochondrial DNA lineages in the *Mytilus edulis* species complex. *Mol. Biol. Evol.*,  
941 12, 893–901.
- 942 ● Rawson PD, Joyner KL, Meetze K, Hilbish TJ (1996) Evidence for intragenic  
943 recombination within a novel genetic marker that distinguishes mussels in the *Mytilus*  
944 *edulis* species complex. *Heredity*, 77(6), 599–607.
- 945 ● Reid NM, Jackson CE, Gilbert D, Minx P, Montague MJ, Hampton TH, Helfrich LW,  
946 King BL, Nacci DE, Aluru N, Karchner SI, Colbourne JK, Hahn ME, Shaw JR,  
947 Oleksiak MF, Crawford DL, Warren WC, Whitehead A (2017) The landscape of  
948 extreme genomic variation in the highly adaptable Atlantic killifish. *Genome Biol.*  
949 *Evol.*, 9(3), 659–676.
- 950 ● Richards EJ, Martin CH (2017) Adaptive introgression from distant Caribbean islands  
951 contributed to the diversification of a microendemic adaptive radiation of trophic  
952 specialist pupfishes. *PLoS Genet.* 13(8), e1006919.
- 953 ● Roux C, Fraïsse C, Castric V, Vekemans X, Pogson GH, Bierne N (2014) Can we  
954 continue to neglect genomic variation in introgression rates when inferring the history  
955 of speciation? A case study in a *Mytilus* hybrid zone. *J. Evol. Biol.*, 27, 1662–1675.
- 956 ● Schmidt PS, Rand DM (1999) Intertidal microhabitat and selection at mpi: interlocus  
957 contrasts in the Northern acorn barnacle, *Semibalanus balanoides*. *Evolution*, 53, 135–  
958 146.
- 959 ● Schmidt PS, Serrao EA, Pearson GA, Riginos C, Rawson PD, Hilbish TJ, Brawley

- 960 SH, Trussell GC, Carrington E, Wethey DS, Grahame JW, Bonhomme F, Rand DM  
961 (2008). Ecological genetics in the North Atlantic: environmental gradients and  
962 adaptation at specific loci. *Ecology*, 89, 91–107.
- 963 ● Śmietanka B, Burzyński A, Wenne R (2010) Comparative genomics of marine mussels  
964 (*Mytilus spp.*) gender associated mtDNA: rapidly evolving atp8. *J. Mol. Evol.*, 71,  
965 385–400.
- 966 ● Skibinski DOF, Beardmore JA, Cross TF (1983) Aspects of the population genetics of  
967 *Mytilus* (Mytilidae; Mollusca) in the British Isles. *Biol. J. Linn. Soc.*, 19, 137–183.
- 968 ● Smith SM, Maughan PJ (2015) SNP genotyping using KASPar assays. *Methods in*  
969 *Mol. Biol.*, 1245, 243–256.
- 970 ● Szulkin M, Gagnaire P-A, Bierne N, Charmantier A (2016) Population genomic  
971 footprints of fine-scale differentiation between habitats in Mediterranean blue tits.  
972 *Mol. Ecol.*, 25, 542–558.
- 973 ● Tine M, Kuhl H, Gagnaire P-A, Louro B, Desmarais E, Martins RST, Hecht J, Knaust  
974 F, Belkhir K, Klages S, Dieterich R, Stueber K, Piferrer F, Guinand B, Bierne N,  
975 Volckaert FAM, Bargelloni L, Power DM, Bonhomme F, Canario AVM, Reinhardt R  
976 (2014) European sea bass genome and its variation provide insights into adaptation to  
977 euryhalinity and speciation. *Nat. Comm.*, 5, 1–10.
- 978 ● Väinölä R, Hvilson MM (1991) Genetic divergence and a hybrid zone between Baltic  
979 and North Sea *Mytilus* populations (Mytilidae: Mollusca). *Biol. J. Linn. Soc.*, 43, 127–  
980 148.
- 981 ● Van Belleghem SM, Rastas P, Papanicolaou A, Martin SH, Arias CF, Supple MA,  
982 Hanly JJ, Mallet J, Lewis JJ, Hines HM, Ruiz M, Salazar C, Linares M, Moreira GRP,  
983 Jiggins CD, Counterman BA, McMillan WO, Papa R (2017) Complex modular  
984 architecture around a simple toolkit of wing pattern genes. *Nat. Ecol. Evol.*, 1, 0052.
- 985 ● Vekemans X (2010) What's good for you may be good for me: evidence for adaptive  
986 introgression of multiple traits in wild sunflower. *New Phytol.*, 187, 6–9.
- 987 ● Wang G-D, Fan R-X, Zhai W, Liu F, Wang L, Zhong L, Wu H, Yang HC, Wu SF, Zhu  
988 CL, Li Y, Gao Y, Ge RL, Wu CI, Zhang YP (2014) Genetic convergence in the  
989 adaptation of dogs and humans to the high-altitude environment of the tibetan plateau.

990 *Genome Biol. Evol.*, 6, 2122–2128.

991 ● Welch JJ, Jiggins CD (2014) Standing and flowing: the complex origins of adaptive  
992 variation. *Mol. Ecol.*, 23, 3935–3937.

993 ● Weir BS, Clark Cockerham C (1984) Estimating F-Statistics for the Analysis of  
994 Population Structure. *Evolution*, 38, 1358.

### 995 **Data Accessibility**

996 **Text S1.** Pairwise  $F_{ST}$  values between Northern species at the GBS SNPs. (A)  $F_{ST}$  between  
997 Med and Nor; (B)  $F_{ST}$  between Med and Tva; (C)  $F_{ST}$  between Nor and Tva; Nor: North Sea  
998 *M. edulis*; Med: West-Mediterranean *M. galloprovincialis*; Tva: Baltic Sea *M. trossulus*.

999 **Text S2.** KASPar genotypes of each individual in the Kerguelen Islands (35 sampling sites),  
1000 plus those of the additional individuals from other Southern Hemisphere populations (6  
1001 sampling sites).

1002 **Text S3.** Individual ancestries estimated with ADMIXTURE for the GBS samples. (A)  $K=2$ ;  
1003 (B)  $K=3$ ; (C)  $K=4$ ; (D)  $K=5$ ; (E)  $K=6$ ; (F)  $K=7$ ; (G)  $K=8$ .

1004 **Text S4.** Individual ancestries estimated with ADMIXTURE for the KASPar samples in the  
1005 Kerguelen ( $K=2$ ; defining reference populations as *M. edulis* and Chilean mussels).

1006 **Text S5.** Joint site frequency spectrum (in  $\partial a \partial i$  format) between the Kerguelen mussels and  
1007 (A) *M. edulis*; (B) *M. galloprovincialis*; (C) *M. trossulus*.

1008 **Text S6.** Definition of the eight models of divergence used in our inferences with  $\partial a \partial i$ .

1009 **Text S7.** Neighbour-joining trees of the 395 retained GBS sequences.

1010 **Dryad doi: 10.5061/dryad.6k740.** DNA sequences and VCF files including GBS genotypes  
1011 of each individual in the twelve GBS-typed populations (eleven Northern populations and  
1012 eight Kerguelen mussels).

1013 **Supplementary Information**

1014 Supplementary Information M&M

1015 Supplementary Information Tables (S1 – S12)

1016 Supplementary Information Figures (S1 – S8)

1017 Supplementary Information Texts (S1 – S7).

1018 **Author Contributions**

1019 Data acquisition: A. Haguenuer, A. Weber and K. Gérard.

1020 Data analysis: C. Fraïsse, A. Chenuil and N. Bierne.

1021 Writing: C. Fraïsse, A. Chenuil and N. Bierne.

1022 Conceptualization: C. Fraïsse, A. Chenuil and N. Bierne.

1023 Funding acquisition: A. Chenuil and N. Bierne.

## 1024 **Tables**

Table 1. Counting the different topologies

| topology                                      | categories                      | counts             |                    |
|-----------------------------------------------|---------------------------------|--------------------|--------------------|
|                                               |                                 | weight $\geq 0.90$ | weight $\geq 0.75$ |
| A. <i>M. edulis</i> with Kerguelen            | A1 ancient Kerguelen divergence | 3                  | 5                  |
|                                               | A2 introgression                | 5                  | 12†                |
|                                               | NA                              | 5                  | 22                 |
|                                               | <b>total</b>                    | <b>13</b>          | <b>39</b>          |
| B. <i>M. galloprovincialis</i> with Kerguelen | B1 ancient Kerguelen divergence | 2                  | 2                  |
|                                               | B2 introgression                | 3                  | 3                  |
|                                               | NA                              | 0                  | 4                  |
|                                               | <b>TOTAL</b>                    | <b>5</b>           | <b>9</b>           |
| C. <i>trossulus</i> with Kerguelen            | C1 ancient Kerguelen divergence | 5                  | 11                 |
|                                               | C2 introgression                | 3                  | 4                  |
|                                               | NA                              | 1                  | 4                  |
|                                               | <b>TOTAL</b>                    | <b>9</b>           | <b>19</b>          |
| <b>TOTAL</b>                                  |                                 | <b>27</b>          | <b>67</b>          |

1025 **topology**: three topologies have been weighted with *Twisst*; **categories**: “ancient divergence”:  
 1026 the Kerguelen population branched as a sister-clade to a Northern species; “introgression”:  
 1027 Kerguelen mussels were distributed within a Northern species; “na”: topologies that we were  
 1028 unable to classify in these two categories. **weight**: exact weightings of each topology to the  
 1029 full tree.

Table 2. RDA analysis for the KASPar dataset (695 individuals, 33 SNPs)

|                           | RDA (N=695) |           |      |           |                                      | conditioned RDA (N=695) |           |      |           |
|---------------------------|-------------|-----------|------|-----------|--------------------------------------|-------------------------|-----------|------|-----------|
|                           | variance    | %variance | d.f. | p-value   |                                      | variance                | %variance | d.f. | p-value   |
| <b>A. Global effect</b>   |             |           |      |           | <b>A. Environmental effect</b>       |                         |           |      |           |
| Model                     | 0.5288      | 2.324     | 7    | 0.001 *** | Substrate+ <i>Macrocystis</i> +Slope | 0.1213                  | 1.0929    | 6    | 0.041 *   |
| Residual                  | 22.2183     | 97.676    | 687  | -         | Residual                             | 10.9621                 | 98.7588   | 687  | -         |
| <b>B. Marginal effect</b> |             |           |      |           | <b>B. Individual effect</b>          |                         |           |      |           |
| Longitude                 | 0.0128      | 0.0563    | 1    | 0.664     | Longitude                            | 0.1424                  | 0.626     | 1    | 0.001 *** |
| Substrate                 | 0.0594      | 0.261     | 3    | 0.133     | Substrate                            | 0.2322                  | 1.021     | 3    | 0.001 *** |
| <i>Macrocystis</i>        | 0.0275      | 0.121     | 1    | 0.032 *   | <i>Macrocystis</i>                   | 0.0691                  | 0.304     | 1    | 0.011 *   |
| Slope                     | 0.0379      | 0.167     | 2    | 0.217     | Slope                                | 0.0912                  | 0.401     | 2    | 0.072 .   |
| Residual                  | 10.9621     | 48.191    | 687  | -         | Residual                             | 22.2183                 | 97.676    | 687  | -         |

1030 Significance tests are shown on the left for the global model with nonsignificant terms removed (**A**). The marginal effect of each constraining variable  
1031 (**B**) was tested through permutation tests by removing each term one by one from the model containing all other terms. Conditioned RDA significance  
1032 tests are shown on the right for the combined effect of environmental variables (**A**) after conditioning on Longitude; and for each term (**B**) after  
1033 conditioning on other constraining variables to remove their confounding effects. **N**: number of individual genotypes; **variance**: genotypic variance  
1034 explained by each factor; **%variance**: percent of genotypic variance; **d.f.**: degrees of freedom; **p-value**: p-values obtained through 1000 permutations  
1035 (\* ≤ 0.05; \*\* ≤ 0.01; \*\*\* ≤ 0.001).
